# Design considerations of a wearable electronic-skin for mental health and wellness: balancing biosignals and human factors

Yasser Khan<sup>a,1</sup>, Matthew L. Mauriello<sup>b,1</sup>, Parsa Nowruzi<sup>c</sup>, Akshara Motani<sup>c</sup>, Grace Hon<sup>c</sup>, Nicholas Vitale<sup>d</sup>, Jinxing Li<sup>a</sup>, Jayoung Kim<sup>a</sup>, Amir Foudeh<sup>a</sup>, Dalton Duvio<sup>c</sup>, Erika Shols<sup>c</sup>, Megan Chesnut<sup>c</sup>, James Landay<sup>e</sup>, Jan Liphardt<sup>f</sup>, Leanne Williams<sup>c</sup>, Keith D. Sudheimer<sup>g</sup>, Boris Murmann<sup>d</sup>, Zhenan Bao<sup>a,2</sup>, and Pablo E. Paredes<sup>c,h,2</sup>

<sup>a</sup> Department of Chemical Engineering, Stanford University, Stanford, CA 94305

<sup>b</sup> Department of Computer and Information Sciences, University of Delaware, Newark, DE 19711

<sup>c</sup> Department of Psychiatry and Behavioral Sciences, Stanford University, Stanford, CA 94305

<sup>d</sup> Department of Electrical Engineering, Stanford University, Stanford, CA 94305

<sup>e</sup> Department of Computer Science, Stanford University, Stanford, CA 94305

<sup>f</sup> Department of Bioengineering, Stanford University, Stanford, CA 94305

<sup>g</sup> Department of Anatomy, Southern Illinois University, Carbondale, IL 62901

<sup>h</sup> Department of Epidemiology and Population Health, Stanford University, Stanford, CA 94305

<sup>1</sup> Y.K. and M.L.M contributed equally to this work.

<sup>2</sup> e-mail: [zbao@stanford.edu](mailto:zbao@stanford.edu); [paredes@cs.stanford.edu](mailto:paredes@cs.stanford.edu)

Keywords: wearable electronics | electronic-skin | bioelectronics | mental health | mental wellness | precision psychiatry | heart rate variability | skin conductance | cortisol

## Abstract

Chronic stress has been associated with a variety of pathophysiological risks including developing mental illness. Conversely, appropriate stress management, can be used to foster mental wellness proactively. Yet, there is no existing method that accurately and objectively monitors stress. With recent advances in electronic-skin (e-skin) and wearable technologies, it is possible to design devices that continuously measure physiological parameters linked to chronic stress and other mental health and wellness conditions. However, the design approach should be different from conventional wearables due to considerations like signal-to-noise ratio and the risk of stigmatization. Here, we present a multi-part study that combines user-centered design with engineering-centered data collection to inform future design efforts. To assess human factors, we conducted an  $n=24$  participant design probe study that examined perceptions of an e-skin for mental health and wellness as well as preferred wear locations. We complement this with an  $n=10$  and  $n=16$  participant data collection study to measure physiological signals at several potential wear locations. By balancing human factors and biosignals, we conclude that the upper arm and forearm are optimal wear locations.

33 Daily stress is defined as the routine challenges of day- 83  
34 to-day living. These challenges can either be predictable 84  
35 (e.g., daily commutes) or unpredictable (e.g. a sudden dead- 85  
36 line) and occur in 40% of all days.<sup>[1]</sup> Daily stress has been 86  
37 shown to cause psychological distress and exacerbate symp- 87  
38 toms of existing physical health conditions.<sup>[2]</sup> Repeated trig- 88  
39 gering of daily stress can also lead to chronic stress, which 89  
40 has been associated with a variety of pathophysiological 90  
41 risks—conditions that impair quality of life, shorten life 91  
42 expectancy, and can include developing mental illness.<sup>[2,3]</sup> 92  
43 Six hundred million people are devastated by depression 93  
44 and anxiety, and it is the cause for the loss of trillions of 94  
45 dollars each year from our global economy.<sup>[4]</sup> Mental ill- 95  
46 ness is now the number one silent killer of adults, and the 96  
47 number one cause of disability worldwide.<sup>[5]</sup> According to 97  
48 the World Health Organization, one person dies by suicide 98  
49 every 40 seconds.<sup>[6]</sup> Despite this crisis, available resources 99  
50 and access to care scarcely begin to meet the need. Compli- 100  
51 cating matters further, we have no objective tests or scalable 101  
52 technologies for detecting chronic stress, the type of mental 102  
53 illness a person is at risk for, what stage of illness they are 103  
54 in, nor do we know how to best intervene. 104

55 Toward addressing these needs, one promising area of re- 105  
56 search focuses on continuous sensing of physiological data 106  
57 using wearable sensors and devices. Wearable devices can 107  
58 provide unobtrusive and non-invasive monitoring of health 108  
59 markers making them ideal platforms for mental health and 109  
60 wellness monitoring. A growing body of literature indi- 110  
61 cates physiological parameters such as heart rate variability 111  
62 (HRV),<sup>[7-9]</sup> and skin conductance (SC),<sup>[10-12]</sup> and biochemi- 112  
63 cal signals, such as cortisol<sup>[13-16]</sup> are linked to stress, anx- 113  
64 iety, and depression. HRV and SC are normally collected 114  
65 with large desktop signal acquisition units, while cortisol 115  
66 levels in bodily fluids are measured using enzyme-linked 116  
67 immunosorbent assay (ELISA)<sup>[17]</sup> and liquid chromatogra- 117  
68 phy/mass spectrometry (LC/MS) in lab settings. With excit- 118  
69 ing advancements in electronic-skin (e-skin) and wearable 119  
70 technology, it is now possible to design wearables that can 120  
71 easily measure HRV,<sup>[18,19]</sup> SC,<sup>[20,21]</sup> and potentially corti-  
72 sol.<sup>[22,23]</sup> Such a wearable can potentially enable a better  
73 understanding of how these parameters are linked to chronic  
74 stress, anxiety, and/or depression thus allowing users and  
75 their health providers to detect the onset of related mental  
76 health issues for earlier treatment and intervention. Cur-  
77 rently, wearables are widely used for lifestyle (e.g., fit-  
78 ness) and medical monitoring.<sup>[24-26]</sup> In these wearables, the  
79 biosignals dictate design choices while form factor is often  
80 a secondary concern. However, in the case of wearables  
81 for mental health and wellness that may be used widely by  
82 people and patients, both biosignals and human factors are

important to consider to improve long term adherence when  
used for proactive, preventative, and treatment purposes.

Here, we present an approach that combines user-  
centered design with engineering-centered biosignal mea-  
surement to identify optimal wear locations for designing  
mental health and wellness wearables that take into account  
both biosignals and human factors. In our multi-part user-  
centered design study, we first examined usability factors  
such as comfort, placement, and ease-of-use through a de-  
sign probe study ( $n=24$ ) that utilized a low-fidelity e-skin  
wearable prototype. This first component of the study in-  
vestigated user perceptions and preferences of e-skin wear-  
ables for mental health and wellness applications, identified  
several factors that may contribute to acceptance and adher-  
ence, and explored how these perceptions and preferences  
might change after a short wear session using a follow-up  
survey. We then performed a complementary on-body data  
collection study to measure HRV ( $n=10$ ), SC ( $n=10$ ), and  
cortisol levels ( $n=16$ ) at several of these potential body  
locations. While the wrist and the forehead are rich for  
sensing, users tend to prefer more discreet wear locations  
for privacy, such as the upper arm and torso. Thus, we used  
a weighting mechanism to merge both human factors and  
biosignals. This weighting yielded the upper arm as the  
optimal wear location, followed by the forearm, for e-skin  
mental health and wellness wearables.

Our results also suggest that wearable technologies could  
be adopted by end-users for not only treatment but also  
proactive mental wellness applications like the daily moni-  
toring of stress. Interestingly, participants proposed such  
adoption could have the added benefit of normalizing con-  
versations around mental health and wellness. However,  
participants remained concerned about such technologies  
marking them as part of a stigmatized group. As a re-  
sult, factors such as comfort, size, and concealability were  
viewed as critical to adoption and factored into their choice  
in where to wear our low-fidelity wearable prototype during  
their short exposure.

## Design criteria of a wearable for mental health and wellness

To increase adoption, the following desired properties, as  
shown in Fig. 1a, should be considered during the design  
process of the wearable. If a sensor is imperceptible, *skin-  
like*, and seamless to use then there is a greater chance  
of adoption. Additionally, the device should not hinder the  
movement or comfort of the user. Privacy is another key fac-  
tor that should be considered during the design process. The  
wearable should be *private* and concealable under everyday

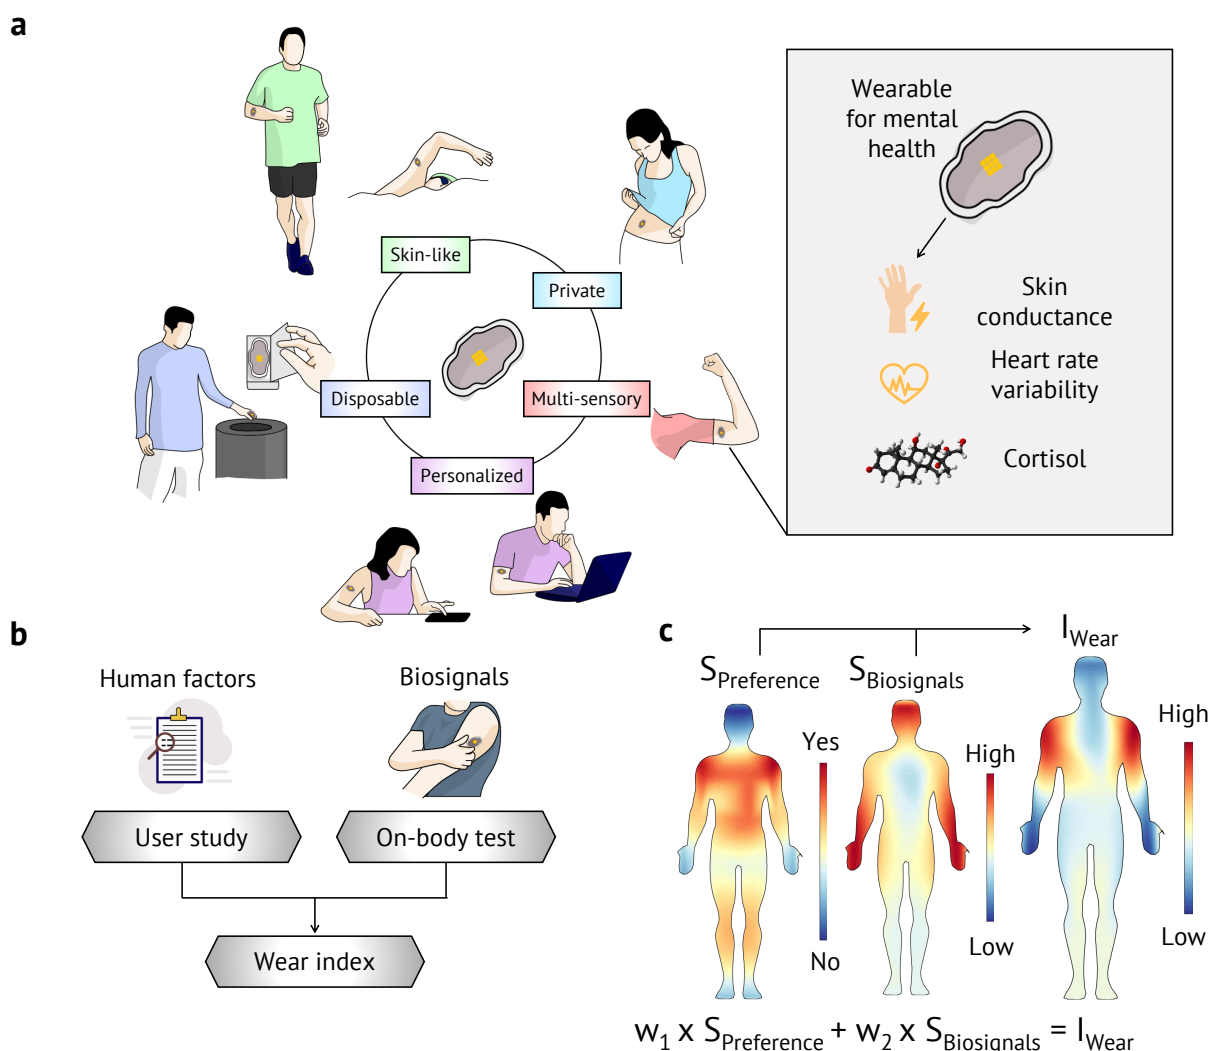

**Figure 1. Design criteria for a mental health and wellness wearable.** (a) Desired properties of the device: (i) The sensor should be *skin-like* and imperceptible to the user. (ii) Due to the sensitive nature of the device and data, the sensor should be *private*. (iii) The device needs to be *multi-sensory*, and collect the necessary physiological biosignals, namely, skin conductance, heart rate variability, and cortisol levels. (iv) To take a precision psychiatry approach, the device should be *personalized*, tailored to each individual, and use case. (v) To ensure reliable sensor operation and ease-of-use, the wearable should be low-cost and *disposable*. (b) Overview of the design approach used in this study. We collected user feedback and preference data from a  $n=24$  participant study. We also performed on-body sensing to assess the quality of the biosignals at the preferred body locations. Then we weighted both human factors and biosignal qualities to create a wear index for different wear locations on the body. (c) Visual overview of estimating the optimal wear location. User preference data ( $S_{Preference}$ ) and biosignal data ( $S_{Biosignals}$ ) are used to find the optimal wear locations ( $I_{wear}$ ) on the body.

131 clothing. Since we want to get an overall snapshot of the  
 132 wearer's state of mind, the device should be *multi-sensory*.  
 133 HRV, SC, and cortisol sensing capabilities are highly desir-  
 134 able. Furthermore, a *personalized* approach should be  
 135 taken to customize the design, software, and hardware to  
 136 address the needs of different individuals. Finally, to en-

137 sure personal hygiene, data quality, and convenience, the  
 138 wearable should be low-cost and *disposable*.

139 Existing wearables in commercial and academic domains  
 140 are designed mostly by focusing on biosignal quality. For  
 141 example, the electrocardiography (ECG) signal is the most  
 142 important factor for an ECG patch. While biosignals are

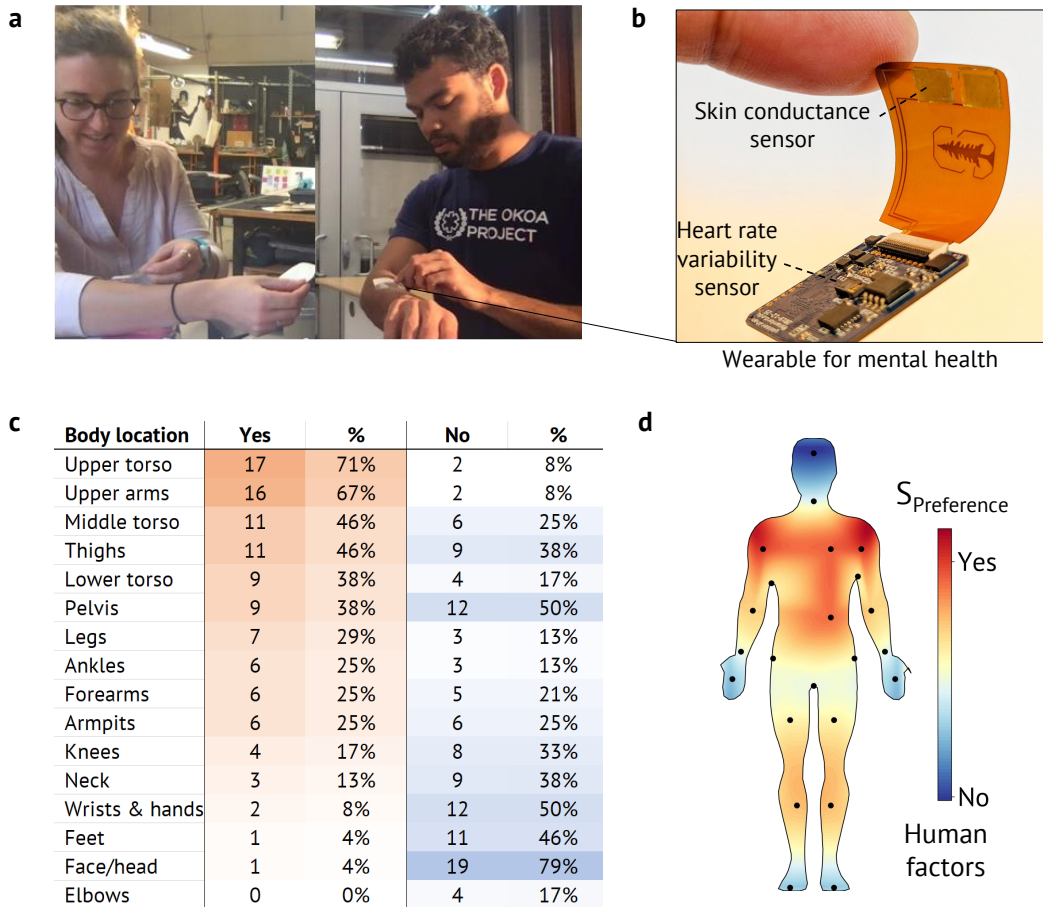

**Figure 2. Summary of the user study on wearability, wear locations, and desired properties of a mental health and wellness wearable.** (a) Photographs of participants interacting with low-fidelity devices with the same form factor of the developed wearable. (b) Sensor utilized for collecting skin conductance (SC) and heart rate variability (HRV) data. The wearable uses an optoelectronic sensor to collect HRV derived from photoplethysmography (PPG) signals. The SC data is collected using a pair of hydrogel-coated electrodes. Both SC and PPG data is transferred using Bluetooth low-energy to a compatible smartphone. (c) Summarized table listing different body locations, positive and negative responses from the participants when asked where they would prefer to wear (Yes) or not to wear (No) the device. The presented data is condensed from the actual survey results for better understanding and visualization. The complete dataset is provided in Supplementary Fig. 5. (d) Summary data is shown visually on the body. Red regions indicate a positive preference (Yes), and blue regions indicate a negative preference (No).

143 very important, it is necessary to include the human fac-  
 144 tors in the design process to address privacy concerns.  
 145 In this work, we used both human factors and biosignals  
 146 for our wearable (Fig. 1b). We studied user perception  
 147 and preference ( $S_{Preference}$ ) on the wearability of such a  
 148 sensor through a design probe study and collected biosig-  
 149 nals ( $S_{Biosignals}$ ) through a lab-based data collection study.  
 150 We weighted both  $S_{Preference}$  and  $S_{Biosignals}$  using differ-  
 151 ent weights to reveal optimal wear locations on the body  
 152 using a wear index created using a weighting mechanism:

( $I_{Wear} = w_1 \times S_{Preference} + w_2 \times S_{Biosignals}$ ). Human factors  
 are expressed in  $S_{Preference}$ , while  $S_{Biosignals}$  expresses the  
 contribution from the biosignals. Fig. 1c visually shows how  
 $S_{Preference}$  and  $S_{Biosignals}$  are utilized to find the optimal  
 wear location.

### Human factor considerations in mental health and wellness wearable design

In our  $n=24$  participant design probe study, we investigated  
 prior experience with wearable devices as well as percep-

162 tions and preferences of a future e-skin mental health and  
163 wellness wearable (Supplementary Note 1 and Supplemen-  
164 tary Figs. 1–7). When asked about their prior experience  
165 with wearable technology, we found that a majority of par-  
166 ticipants (87%, 21/24) strongly associated wearables with  
167 wrist-worn technology for fitness tracking, in particular, with  
168 smartwatches. A third (33%, 8/24) defined wearables as de-  
169 vices that monitor an aspect of the user’s health. Nearly  
170 half mentioned medical devices as examples of wearables  
171 including heart monitors, nicotine patches, and hearing aid  
172 devices. While some (17%, 4/24) had previously worn wear-  
173 ables for fitness tracking or medical reasons, only a small  
174 fraction (8%, 2/24) reported that they used a wearable at  
175 the time of the interview. A majority (75%, 18/24) noted that  
176 they did not need a wearable device, suggesting that they  
177 did not see a utility in them that was not covered by other  
178 common devices like their smartphones. Participants also  
179 reported high cost and lack of comfort as barriers to own-  
180 ership. Of the few who were using a wearable device, most  
181 cited utility and comfort as their top criteria in selecting  
182 their wearables.

183 While a relatively novel use case, most participants (58%,  
184 14/24) expressed general interest in wearables for mental  
185 health and wellness monitoring. A majority (79%, 19/24)  
186 said they would be more likely to use an e-skin wearable  
187 to measure their stress levels if it was recommended by their  
188 doctor. Those who were opposed (21%, 5/24) said medical  
189 advice would not impact their decision.

190 We used paper body maps (Supplementary Fig 3) and  
191 a low-fidelity version of our wearable device in the design  
192 probe study (Fig. 2a) to assess where participants might  
193 wear the e-skin. This low-fidelity device was similar to the  
194 wearable used to collect biosignals (Fig 2b) in terms of size,  
195 shape, and weight as well as the planned method of attach-  
196 ment (*i.e.*, using medical grade tape). In terms of where  
197 future users might wear such a device, participants showed  
198 a strong preference for the upper arms and upper torso (*i.e.*,  
199 chest and back) followed by the stomach, waist, and thighs  
200 (Figs. 2c,d). Participants reported that concealability and  
201 comfort were the top decision factors. Thus, we note that  
202 all these body locations are usually covered by everyday  
203 clothes (*e.g.*, t-shirt, shorts). On the other hand, visible lo-  
204 cations such as the head and extremities (*i.e.*, hands, wrists,  
205 and feet) were undesirable. Similarly, they disliked loca-  
206 tions where the placement of the wearable would interfere  
207 with the body’s natural movement (*e.g.*, elbows, knees). A  
208 condensed version of the body map results is shown in Figs.  
209 2c,d. The complete set of results are discussed in Supple-  
210 mentary Fig. 5.

211 When asked about how often they would change the

wearable, assuming the ideal scenario where the wearable  
is cheap, durable, and waterproof, the answers ranged from  
*daily* to *monthly* with most participants preferring *weekly* or  
*bi-weekly* changes. In rationalizing these decisions, partic-  
ipants balanced several factors such as personal hygiene,  
signal continuity, convenience, and cost (Supplementary  
Fig. 7).

For a wearable to be socially acceptable, more than half  
(58%, 14/24) said its appearance is also an important fac-  
tor. Participants emphasized that the ideal wearable should  
be fashionable (corroborating<sup>[27]</sup>) but also inconspicuous; it  
must seamlessly blend in with the rest of the wearer’s attire  
to avoid unwanted attention. Finally, a third said a wear-  
able would be more acceptable if it was part of a broader  
social trend normalizing the management and monitoring of  
mental health and wellness factors. These comments are  
also corroborated more generally by our pre- and post-  
survey results indicating that while participants were ini-  
tially somewhat concerned about judgment by others or sim-  
ilar negative consequences of wearing such a device, they  
grew more positive about these concerns after a short wear  
session: in the post-wear survey, interest in the e-skin  
wearable increased and participants showed less concern  
that the wearable might make others uncomfortable, cause  
awkwardness, or result in them being ridiculed. Paradox-  
ically, participants became more worried about what such  
a device might communicate about them and their iden-  
tity—being marked as someone in need of mental health  
support. The complete set of survey results are discussed  
in Supplementary Fig. 6.

## Biosignal measurement considerations in a mental health and wellness wearable design

Three biosignals—SC, HRV, and sweat cortisol levels are  
evaluated in this work. SC measures the eccrine sweat gland  
activity. In response to stress stimuli, a number of eccrine  
sweat glands get activated, and SC quantitatively measures  
this activity.<sup>[10]</sup> HRV measures the balance between the two  
autonomic nervous systems—sympathetic and parasympa-  
thetic. The sympathetic nervous system gets activated when  
facing threats or stressors, while the parasympathetic ner-  
vous system handles the body’s relaxed state.<sup>[28]</sup> Finally,  
cortisol is the body’s main stress hormone. In response to  
internal or external stressors, cortisol is released from the  
adrenal glands and puts the body into a heightened-alert  
state. Chronic activation of the stress-response system re-  
sults in overexposure to cortisol, which can disrupt almost all  
the body’s processes.<sup>[29]</sup> We selected sweat cortisol levels  
because sweat can be non-invasively collected.

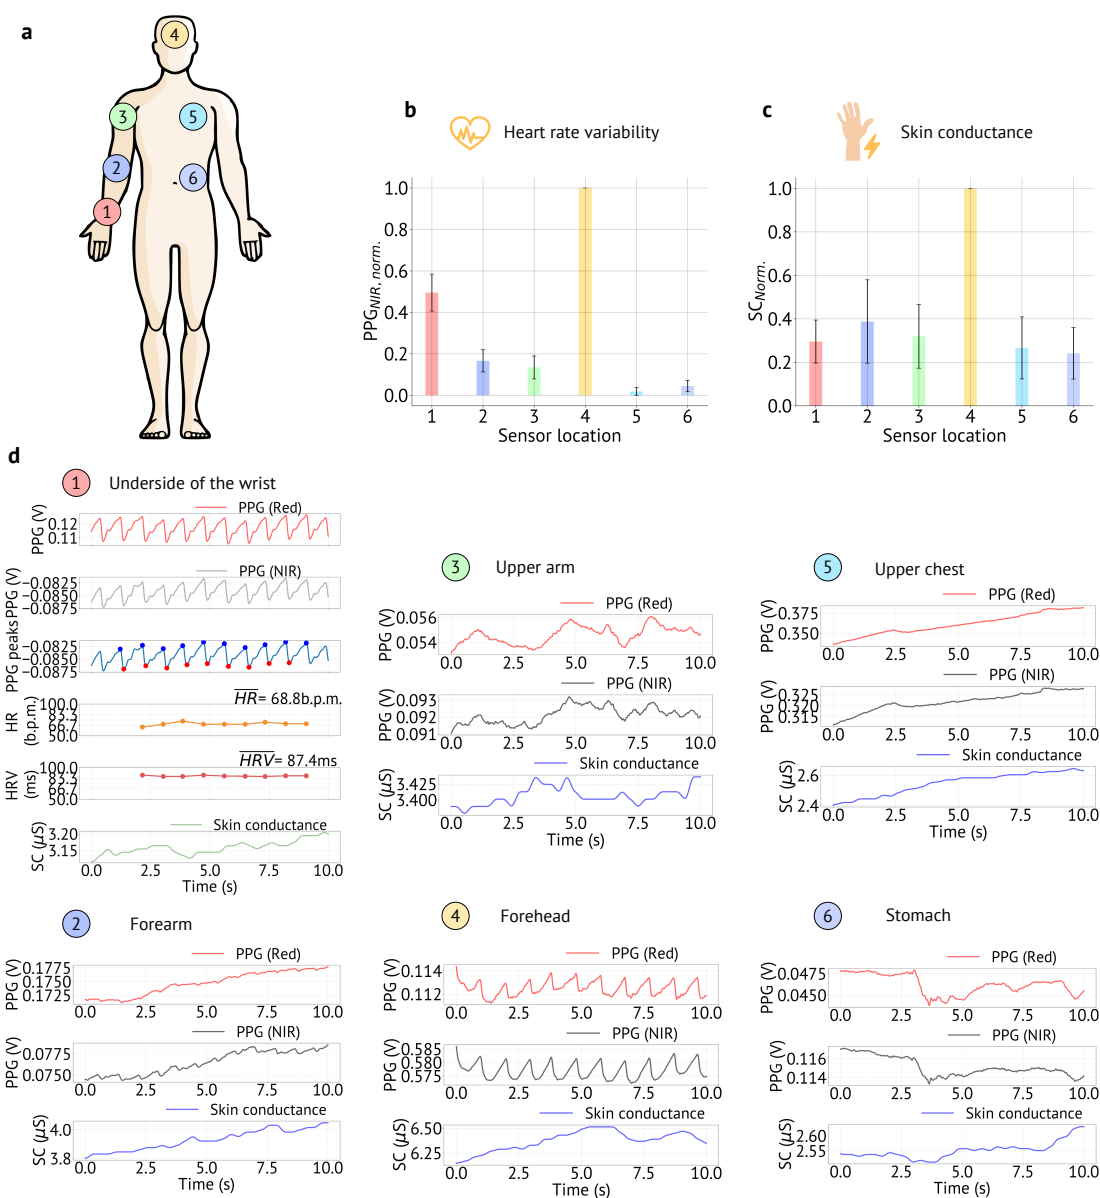

**Figure 3. Heart rate variability (HRV) and skin conductance (SC) data distribution on the body.** (a) Sensor placement locations – (1) wrist, (2) forearm, (3) upper arm, (4) forehead, (5) upper chest, and (6) stomach. (b) Photoplethymogharpy (PPG) signal magnitudes for near-infrared (NIR) light on the aforementioned 6 locations. HRV is derived from PPG, hence, PPG signal magnitudes are used in the analysis. NIR PPG signal was normalized for each participant in the  $n=10$  participant study, and bar heights represent the average of the normalized value and the error bars represent the standard deviation of the normalized value. The complete dataset of  $n=10$  participants is shown in Supplementary Fig. 8. The forehead shows the highest signal magnitude and gradually drops on the wrist, the forearm, and the upper arm. The signal is the lowest on the chest. (c) Variation of SC over the 6 highlighted locations shown in a. The SC data was normalized for each participant in the  $n=10$  participant study, and bar heights represent the average of the normalized value and the error bars represent the standard deviation of the normalized value. The complete dataset of  $n=10$  participants is shown in Supplementary Fig. 10. (d) PPG from red and NIR channels, systolic and diastolic peaks from PPG, heart rate (HR), HRV calculated from PPG signal, and SC from the 6 highlighted locations shown in a. The PPG signal is clear on the wrist, forearm, upper arm, and forehead. The PPG signal gets highly attenuated on the upper chest and stomach.

260 Signal strengths of SC, HRV, and cortisol vary significantly on the body. HRV, which is derived from the photoplethysmography (PPG) signal in our wearable, depends on the arterial blood signal collected by an optical sensor. The higher the signal coming from the arteries, the better the PPG signal quality. Therefore, locations where the arteries are near the surface of the skin, provide excellent PPG signal. The forehead and the underside of the wrist are usually good choices for reflection-mode PPG sensing.<sup>[30,31]</sup> On the other hand, SC depends on the density of the eccrine sweat glands, which is highest on the fingers and the palm, and drops roughly by half on the wrist and the forearm.<sup>[32,33]</sup> We selected 6 locations on the body for an on-body data collection study (Fig. 3a). These locations, namely, (1) wrist, (2) forearm, (3) upper arm, (4) forehead, (5) upper chest, and (6) stomach, were chosen because of high user preference. Although the wrist and the forehead were not preferred locations indicated in the design probe study, we chose the forehead due to the high biosignal intensities, and the wrist because most commercial wearables are wrist-worn thus providing a reasonable baseline for comparison.

281 We used a custom-built wearable (Fig. 2b) to collect PPG and SC data from these 6 locations on the body. The PPG data was collected by using red and near-infrared (NIR) lights. We used the NIR PPG signal for HRV calculations. The bar chart in Fig. 3b shows the average PPG signal magnitude and variation at different places on the body. NIR PPG signal was normalized for each participant, and the average value (bar height) and the standard deviation (error bar) of the normalized data are shown in Fig. 3b. The complete dataset of  $n=10$  participants is shown in Supplementary Fig. 8. The forehead provides the highest signal magnitude (100%). For NIR light, the average normalized PPG signal percentages are 49.54, 16.64, 13.44, 100.00, 1.85, and 4.46 on the wrist, forearm, upper arm, forehead, upper chest, and stomach, respectively. The reproducibility of the measurement is shown in Supplementary Fig. 9, where 5 consecutive PPG measurements were collected from one participant while donning and doffing the sensor for each measurement. The upper chest showed the lowest signal magnitude and was susceptible to motion artifacts during breathing. A similar study was performed for measuring SC. We observed SC with average normalized percentages of 29.53, 38.77, 31.97, 100.00, 26.60, and 24.16 on the wrist, forearm, upper arm, forehead, upper chest, and stomach, respectively. Similar to the PPG signal, the data was collected from 10 healthy volunteers. The SC data was normalized for each participant, and the average value (bar height) and the standard deviation (error bar) of the normalized data are shown in Fig. 3c. The complete dataset of

$n=10$  participants is shown in Supplementary Fig. 10. We performed a reproducibility study of the SC sensor, which is presented in Supplementary Fig. 11.

In HRV calculations, we used the root mean square successive difference (RMSSD) of the PPG signal. Five consecutive peaks were used to create a measurement window, which was moved to form a moving window for HRV calculations. Fig. 3d(1) shows the raw red and NIR PPG signals, PPG signal peaks, calculated heart rate (HR), HRV, and SC on the wrist of a volunteer. Figs. 3d(2)–(6) show the red and NIR PPG signals and SC from the forearm, upper arm, forehead, upper chest, and stomach, respectively. The PPG signal is pristine on the wrist and the forehead, but gets attenuated on the forearm and the upper arm. To calculate HRV, it is imperative that the PPG signal quality is good enough for a peak detection algorithm. Figs. 3d(1)–(4) show that the NIR PPG signals on the wrist, forearm, upper arm, and forehead are adequate for the peak detection algorithm. However, on the upper chest and the stomach, the signals barely show PPG peaks, making them unusable for HRV calculations. Both on the chest and the stomach, the PPG signals become modulated with respiration. Representative data where respiration severely affects the PPG signal is shown in Supplementary Fig. 12.

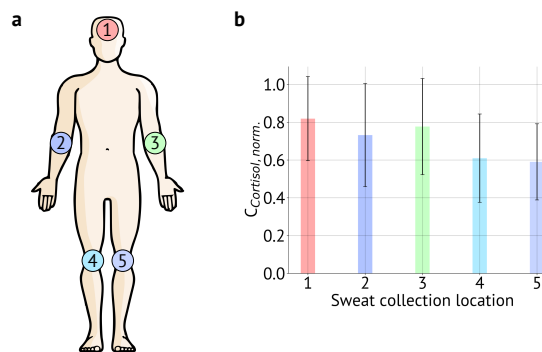

**Figure 4. Sweat cortisol distribution on the body.** (a) Sweat collection locations – (1) forehead, (2) right arm (cubital fossa), (3) left arm (cubital fossa), (4) back of the right knee (popliteal fossa), and (5) back of the left knee (popliteal fossa). (b) Sweat cortisol concentrations on the aforementioned 5 locations. Sweat cortisol concentrations were normalized for each participant in the  $n=16$  participant study, and bar heights represent the average of the normalized value and the error bars represent the standard deviation of the normalized value. The complete dataset of  $n=16$  participants is shown in Supplementary Fig. 13.

334 Cortisol, the third physiological parameter used in this  
335 study, was measured from sweat samples. The samples were  
336 collected from 16 volunteers at (1) forehead, (2) right arm  
337 (cubital fossa), (3) left arm (cubital fossa), (4) back of the  
338 right knee (popliteal fossa), and (5) back of the left knee  
339 (popliteal fossa) (Fig. 4a). Sweat cortisol concentrations  
340 were normalized for each participant, and the average value  
341 (bar height) and the standard deviation (error bar) of the  
342 normalized data are shown in Fig. 4b. We observed aver-  
343 age normalized cortisol percentages of 81.92, 73.19, 77.70,  
344 60.96, and 59.02 on the aforementioned five locations, re-  
345 spectively. The complete dataset of  $n=16$  participants is  
346 shown in Supplementary Fig. 13.

### 347 **Optimal placement locations for mental health and** 348 **wellness wearables**

349 To increase adoption and social acceptability, it is essen-  
350 tial to reconcile both human factors and biosignals. In our  
351 analysis, the user preference data was collected from the  
352 design probe study, and the biosignals data was collected  
353 from the on-body sensing. For better visualization, we cre-  
354 ated body contour maps from the collected data. SC, HRV,  
355 and cortisol contour maps are shown in Figs. 5a–c. Here,  
356 the red regions signify higher signal quality, and the blue  
357 regions signify lower signal quality. The black dots repre-  
358 sent data collection locations. All three were combined to  
359 create the biosignal body contour map using equal weights,  
360  $S_{Biosignals} = w_1 \times S_{SC} + w_2 \times S_{HRV} + w_3 \times S_{Cortisol}$ ,  
361 where,  $w_1 = w_2 = w_3 = 0.33$  (Fig. 5d). The user pref-  
362 erence body contour map was generated from the design  
363 probe study (Fig. 5e). Here, the red regions imply higher  
364 user preference, and the blue regions imply lower user pref-  
365 erence. Finally, both human factors and biosignals were  
366 balanced to find the optimal wear location using the wear  
367 index,  $I_{Wear} = w_1 \times S_{Preference} + w_2 \times S_{Biosignals}$ , as  
368 shown in Figs. 5f–h. The impact of  $S_{SC}$  and  $S_{HRV}$  on  
369  $I_{Wear}$  is discussed in Supplementary Fig. 14. We used  
370 various weight combinations to examine the evolution of the  
371 wear location based on  $S_{Preference}$  and  $S_{Biosignals}$ . When  
372 the preference data is weighted highly at  $S_{Preference} =$   
373  $75\%$  and  $S_{Biosignals} = 25\%$ , the  $I_{Wear}$  is high at locations  
374 that are generally hidden under clothing (Fig. 5f). In the  
375 opposite case, when the biosignals are weighted heavily at  
376  $S_{Biosignals} = 75\%$  and  $S_{Preference} = 25\%$ , the  $I_{Wear}$  is high  
377 at the extremities of the body such as the forehead or the  
378 wrist (Fig. 5h). When both user preference and biosignals  
379 are balanced at  $S_{Preference} = 50\%$  and  $S_{Biosignals} = 50\%$ , a  
380 compromise is reached, and  $I_{Wear}$  is high on the upper arm  
381 and the forearm. Hence, the upper arm or the forearm is

the optimal sensing location for our e-skin wearable, where  
the biosignals are of adequate strength and the location  
provides privacy to the users.

### 385 **Conclusions**

386 Our work corroborates aspects of prior work around factors  
387 that influence wearable design while highlighting concerns  
388 more specific to mental health and wellness applications.  
389 For example, Zeagler et al. developed various body contour  
390 maps that can be used to inform wearable design noting  
391 items like motion impedance (similar to our work) as a con-  
392 cern or that certain areas of the body are optimal for PPG  
393 sensing.<sup>[34]</sup> However, these factors were viewed individually.  
394 Our work unifies biosignals with human factors to build a  
395 context-aware body contour map in addition to contribut-  
396 ing body contour maps for additional sensing (*i.e.*, SC and  
397 cortisol) and location preferences. As our context is mental  
398 health and wellness, privacy and discreetness are prioritized  
399 due to concerns around social stigmatization.<sup>[35,36]</sup> We find  
400 that these concerns may be a significant barrier to the ac-  
401 ceptability of mental health and wellness wearables. In our  
402 study, half of the participants considered perceived judg-  
403 ment by others to be a downside of using one. A third  
404 were worried the wearable would distract from their daily  
405 conversations or prompt questions by others.

406 These social considerations are reflected in participants'  
407 preferred wear locations and must be considered during the  
408 design process. Whereas most common health and fitness  
409 wearables are worn on the wrists, we observe that partic-  
410 ipants particularly care about discreetness of the wear  
411 location when it comes to mental health and wellness wear-  
412 ables. For instance, exposed body locations such as the  
413 face, hands, and wrists were among the wear locations most  
414 disliked by participants because they were perceived as dis-  
415 tracting, uncomfortable, and public. However, when it comes  
416 to building wearables, designers are limited not only by user  
417 preferences but also by the availability of biosignals in dif-  
418 ferent body locations. Since much of the wearable industry  
419 has focused on a few specific body locations (*e.g.*, wrists),  
420 there is limited research into the availability of biosignals  
421 in other areas (*e.g.*, upper arms, back, and chest) preferred  
422 by participants in our study. Our aim with these results  
423 is to encourage designers and researchers to develop new  
424 wearables that work on these discreet locations of the body.  
425 Thus, our findings and approach (*i.e.*, the union of biosig-  
426 nals and user preferences) may serve as design guidelines  
427 for future mental health and wellness wearables.

428 While our work has focused on the complexity of and  
429 potential barriers to adopting e-skin wearables, it is im-



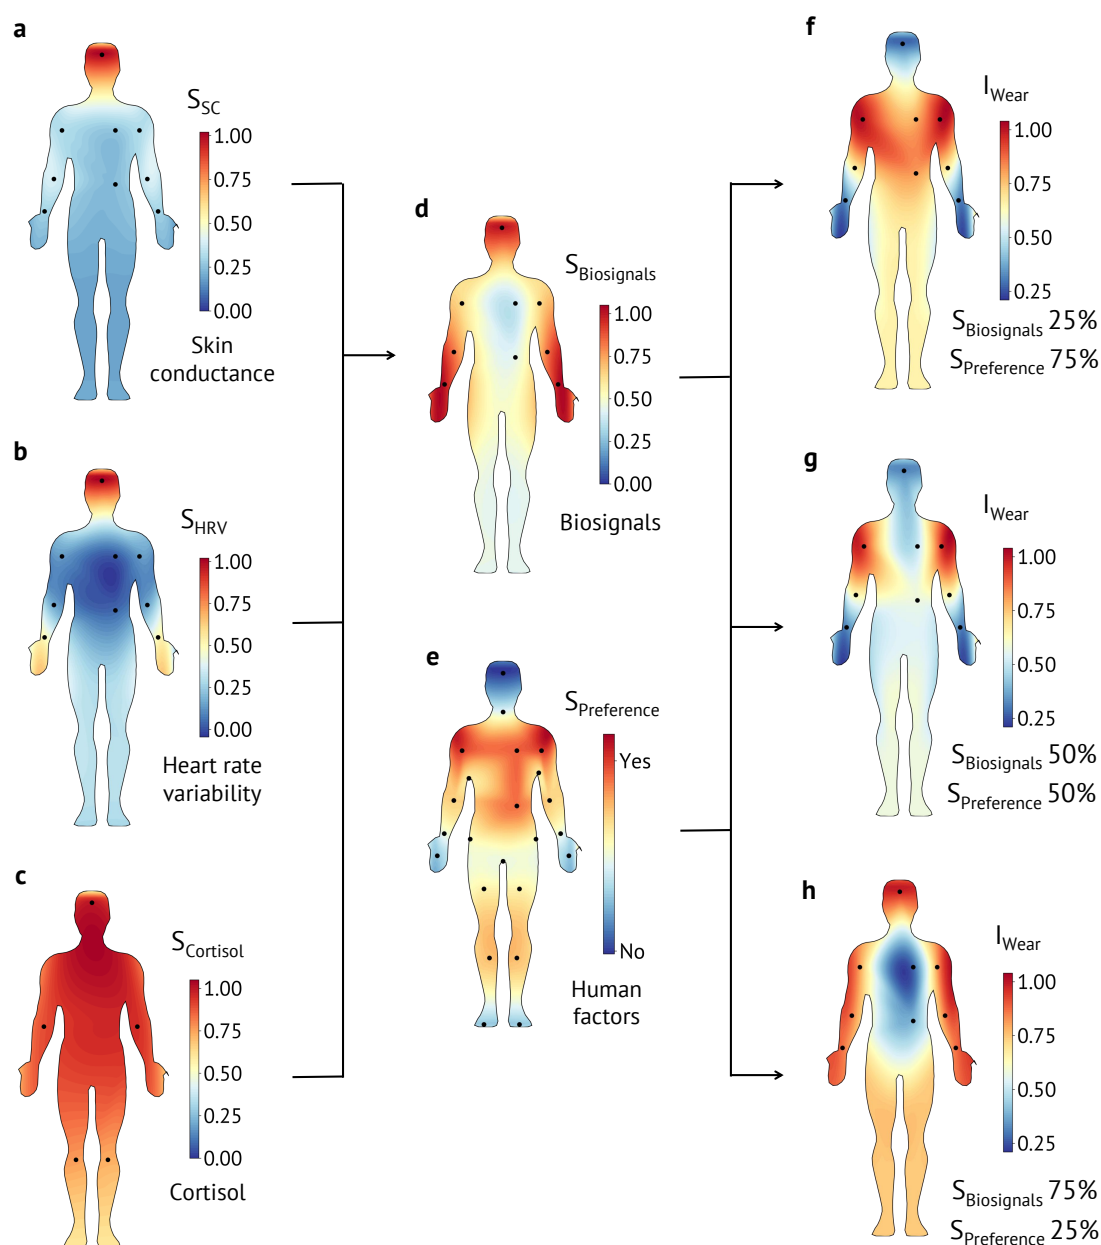

**Figure 5. Optimal wear locations for a mental health and wellness sensor.** (a-c) Distribution of skin conductance (SC), heart rate variability (HRV), and cortisol on the body. Red regions designate higher signal magnitude, and blue regions designate lower signal magnitude. (d) Distribution of combined biosignals ( $S_{Biosignals}$ ) on the body. SC, HRV, and cortisol signal magnitudes are equally weighted to generate the contour map. (e) User preference data ( $S_{Preference}$ ) is shown using a contour map on the body. Here, red regions show a positive preference, and blue regions show a negative preference. (f-h) Optimal wear locations are shown using the wear index ( $I_{Wear}$ ). Red regions show a high  $I_{Wear}$  and blue regions show a low  $I_{Wear}$ . Three different weight combinations are used to generate contour maps. In f, user preference is weighted heavily at  $S_{Preference} = 75\%$  and  $S_{Biosignals} = 25\%$ . It is evident that using user preference, the wear locations are mostly hidden under the clothing on the upper body. In g, both  $S_{Preference}$  and  $S_{Biosignals}$  are weighted at 50%, which yields forearms and upper arms as the optimal wear locations. In h, the biosignals are weighted heavily at  $S_{Biosignals} = 75\%$  and  $S_{Preference} = 25\%$ . In this case, the optimal wear locations move to the extremities of the body where the biosignal strengths are strong.

430 portant to note some concerns about novelty effects when  
431 working with participants. While our participants were fam-  
432 ilar with wearable devices, e-skin devices are still rel-  
433 atively new, and negative reactions to their use in public  
434 has been noted in other contexts (e.g. , e-skins devices for  
435 interactions with other electronic devices<sup>[37]</sup>). Moreover, we  
436 derived our usability and experiential questionnaires from  
437 the WEAR Scale<sup>[38,39]</sup> to understand perceptions of e-skin  
438 wearables as this is important for early design work; how-  
439 ever, future work should explore using a more robust (or the  
440 complete) acceptability scale when evaluating higher fidelity  
441 iterations. Finally, as far as we know all participants were  
442 healthy individuals and future work should involve patients.

## 443 Methods

### 444 Human factors study

445 We conducted a two-part design probe study to investi-  
446 gate users' perceptions of wearable devices and emerging  
447 e-skin technologies for stress monitoring and other men-  
448 tal health applications (Supplementary Figs. 1-7). In part  
449 one, public kiosks were set up at three different locations:  
450 a campus café, the campus bookstore, and the local pub-  
451 lic library. From these kiosks, we recruited passersby for  
452 brief semi-structured interviews (*Median*=24 min, *standard*  
453 *deviation*=4.5 min). In addition to questions about their  
454 wearable device use, participants were asked to indicate on  
455 paper body contour maps (Supplementary Fig. 3) where  
456 they would and would not wear an e-skin for mental health  
457 and wellness applications while "thinking aloud" to explain  
458 their rationale. They then applied a low-fidelity version of  
459 our sensor to their preferred body location using medical  
460 grade tape and completed a short survey (derived from the  
461 WEAR scale<sup>[38,39]</sup>) about their demographics, the comfort of  
462 the low-fidelity wearable prototype, and the perceived so-  
463 cial acceptability around its use. In part two, we asked  
464 participants to go about the rest of their day while contin-  
465 uing to wear the low-fidelity wearable prototype and then  
466 to complete a follow-up survey similar to the prior but with  
467 additional open-text response questions about their experi-  
468 ence; this data was then treated as a pre-post test with  
469 results presented in Supplementary Fig. 6.

470 **Human factors study participants:** In total, we recruited  
471 24 participants (12 male, 11 female, 1 non-binary) from  
472 the Palo Alto, California area. Participants were, on aver-  
473 age, 35.8 years old (*Median*=28, *standard deviation*=15.4).  
474 Most (79%) had a high degree of formal education (bach-  
475 elor's and higher) and most (79%) were white or asian.  
476 Half (50%) were working full-time and over a third (38%)

were students. Scores on the short Perceived Stress Scale  
(PSS-4)<sup>[40,41]</sup> indicate that most experienced moderate lev-  
els of stress over the last month (*Median*=6.44, *standard*  
*deviation*=3.29) (Supplementary Fig. 2). All experiments  
were performed in strict compliance with the guidelines of  
IRB and were approved by the Committee for Protection of  
Human Subjects at Stanford University (protocol no., IRB-  
45825). Informed consent was obtained from all participants.

**Human factors data and analysis:** In sum, data from this  
study includes: survey responses, paper body contour maps,  
and interview transcripts. Descriptive statistics were calcu-  
lated from closed-form survey results while open-response  
questions were thematically analyzed. Similarly, descrip-  
tive statistics were generated about regions indicated on the  
paper body contour maps. All interviews were recorded and  
professionally transcribed for computer-assisted qualitative  
data analysis using NVivo (v12). A researcher began the  
analysis by designing a preliminary codebook based on our  
research questions as well as concepts raised in prior liter-  
ature. Random selections of 12% of the interview transcripts  
were independently coded by two researchers according to  
this primary codebook and inter-rater reliability (IRR) was  
measured using Cohen's kappa ( $\kappa$ ). Between rounds, the  
researchers met to resolve disagreements and update the  
codebook. An overall  $\kappa=0.83$ , considered an almost perfect  
agreement, was achieved after two rounds of coding. The  
remaining interviews were then independently coded.

### 477 Biosignal data collection and processing

**SC and HRV data collection study:** SC and HRV data  
collection were performed using a custom-built wearable  
device. In the sensor, a pair of electrodes with hydrogel  
was used to collect the SC data. Using a feedback loop  
with a pair of operation amplifiers (op amps), we ensured  
that  $<10\mu\text{A}$  current flows for typical SC in the range of  
0-50  $\mu\text{S}$ . Texas Instruments TLV9102, dual 1MHz, 16-V  
rail-to-rail op amps were used to implement the SC read-  
out circuit. The output signal was sampled using a 12-bit  
analog-to-digital-converter (ADC) of a Nordic Semiconduc-  
tor nRF52832 Bluetooth transceiver.

The HRV signal was obtained from PPG signals collected  
by an optical sensor. SFH 7050 from OSRAM Opto Semi-  
conductors Inc. was interfaced with the nRF52832 Blue-  
tooth transceiver using a serial peripheral interface (SPI).  
Red (660 nm) and NIR (950 nm) lights were used to collect  
the PPG signals at 100 Hz sampling frequency. A silicon  
photodiode of the SFH 7050 sensor was used to collect the  
reflection-mode optical signal.

**SC and HRV data collection study participants:** 10

525 healthy volunteers (6 male, 4 female) participated in the  
526 on-body SC and HRV data collection study. The volunteers  
527 were asked to put on the sensors on 6 different locations on  
528 the body. Then SC and HRV data were collected using the  
529 wearable and a mobile app for 2 minutes at every location.  
530 All experiments were performed in strict compliance with  
531 the guidelines of IRB and were approved by the Commit-  
532 tee for Protection of Human Subjects at Stanford University  
533 (protocol no., IRB-41837).

534 **SC and HRV data analysis:** SC raw data was collected  
535 from the sensor and sent over Bluetooth to a smartphone. In  
536 the case of HRV, PPG signals from red and NIR channels  
537 were collected, and the NIR signal was used in a peak  
538 detection algorithm to find the systolic peaks. HR and HRV  
539 were calculated from the systolic peaks. RMSSD of the  
540 peaks,  $\sqrt{\frac{\sum_{i=1}^{n-1}(\text{Peak}_i - \text{Peak}_{i+1})^2}{n-1}}$  were used to calculate the  
541 HRV. Here, five consecutive systolic peaks (n=5) were used  
542 to create a windowed measurement.

543 **Cortisol data collection study:** Sweat cortisol samples  
544 were collected from volunteers during a body temperature  
545 manipulation study, which was part of a larger protocol.  
546 Volunteers sat in a portable dry infrared sauna that zipped  
547 up around the chin. Their whole body was enclosed in the  
548 sauna except their head. The sauna temperature was set  
549 to 60 °C (140 °F). Volunteers remained in the sauna until  
550 either 45 min had elapsed, or until their core body temper-  
551 ature reached the maximum safety limit of 39.4 °C (103 °F).  
552 Volunteers had their core body temperature measured using  
553 an infrared tympanic membrane thermometer every 3 min  
554 that they were in the sauna to ensure that their core body  
555 temperature did not get too high. We collected sweat sam-  
556 ples from participants as their bodies attempted to regulate  
557 their core body temperature. Sweat was collected utiliz-  
558 ing an array of non-woven dental sponges to absorb the  
559 sweat from the skin surface. Dental sponges were affixed  
560 to the body using a transparent stretchable and waterproof  
561 medical dressing (Tegaderm, 3M). Sweat was collected from  
562 the forehead proximal to the frontal bone, the cubital fossa  
563 (inside of elbow), popliteal fossa (back of the knee). The  
564 cubital fossa and popliteal fossa dental sponges were placed  
565 bilaterally on both the left and right sides. Once volunteers  
566 exited the sauna the sweat saturated dental sponges were  
567 placed in centrifuge-compatible tubes originally designed to  
568 extract saliva from cotton swabs (Salivette system, Sarstedt,  
569 inc). The dental sponges were centrifuged at 3300 revolu-  
570 tions per minute (rpm) for 10 min to separate sweat from the  
571 dental sponge. Sweat samples were then frozen and stored  
572 at -80 °C until they were thawed for analysis.

573 **Cortisol data analysis:** The analysis of sweat samples

was conducted by Dresden lab service utilizing a standard  
ELISA with a 0.2 nmol limit of detection (LOD) and a co-  
efficient of variability of <7% for both the inter-assay and  
intra-assay measures.

## Optimal placement location

In the optimal sensor placement analysis, the biosignal data  
for SC, HRV, and cortisol were normalized first using the  
equation:  $S_{Biosignal,normalized} = \frac{S_{Biosignal,i}}{\max(S_{Biosignal})}$ . To compute  
the overall effects of biosignals, SC, HRV, and cortisol data  
were equally weighted using the equation:  $S_{Biosignals} =$   
 $w_1 \times S_{SC} + w_2 \times S_{HRV} + w_3 \times S_{Cortisol}$ , where,  $w_1 = w_2 =$   
 $w_3 = 0.33$ . Throughout this work, the contour maps were  
generated by interpolating the sensor data in 2D space. A  
false average color was assigned to the corners of the plots  
for better visualization. After that, both human factors and  
biosignals were used to generate the wear index,  $I_{Wear} =$   
 $w_1 \times S_{Preference} + w_2 \times S_{Biosignals}$ . Here,  $w_1$  and  $w_2$  were  
assigned the combinations of ( $w_1 = 0.75, w_2 = 0.25$ ), ( $w_1 =$   
 $0.50, w_2 = 0.50$ ), and ( $w_1 = 0.25, w_2 = 0.75$ ) to investigate  
the effects of human factors and biosignals in determining  
the optimal sensor placement. All analyses were performed  
using custom-written Python 3.6 scripts.

## References

- [1] Almeida, D. M. Resilience and vulnerability to daily stressors as-  
sessed via diary methods. *Current Directions in Psychological Sci-*  
*ence* **14**, 64–68 (2005).
- [2] McEwen, B. S. Stress, adaptation, and disease: Allostasis and  
allostatic load. *Annals of the New York academy of sciences* **840**,  
33–44 (1998).
- [3] Epel, E. S. *et al.* Accelerated telomere shortening in response to  
life stress. *Proceedings of the National Academy of Sciences* **101**,  
17312–17315 (2004).
- [4] Patel, V. *et al.* The lancet commission on global mental health and  
sustainable development. *The Lancet* **392**, 1553–1598 (2018).
- [5] Friedrich, M. J. Depression is the leading cause of disability around  
the world. *Jama* **317**, 1517–1517 (2017).
- [6] (WHO), W. H. O. *et al.* Suicide: One person dies every 40 seconds.  
*Retrieved February 3, 2020* (2019).
- [7] Kemp, A. H. *et al.* Impact of depression and antidepressant treatment  
on heart rate variability: a review and meta-analysis. *Biological*  
*Psychiatry* **67**, 1067–1074 (2010).
- [8] Chalmers, J. A., Quintana, D. S., Abbott, M. J., Kemp, A. H. *et al.*  
Anxiety disorders are associated with reduced heart rate variability:  
a meta-analysis. *Frontiers in Psychiatry* **5**, 80 (2014).
- [9] Alvares, G. A., Quintana, D. S., Hickie, I. B. & Guastella, A. J.  
Autonomic nervous system dysfunction in psychiatric disorders and  
the impact of psychotropic medications: a systematic review and  
meta-analysis. *Journal of Psychiatry & Neuroscience* (2016).

- 622 [10] Boucsein, W. *Electrodermal activity* (Springer Science & Business 623 Media, 2012).
- 624 [11] Vahey, R. & Becerra, R. Galvanic skin response in mood disorders: 625 A critical review (2015).
- 626 [12] Sarchiapone, M. *et al.* The association between electrodermal ac- 627 tivity (eda), depression and suicidal behaviour: A systematic review 628 and narrative synthesis. *BMC Psychiatry* **18**, 22 (2018).
- 629 [13] Knorr, U., Vinberg, M., Kessing, L. V. & Wetterslev, J. Salivary 630 cortisol in depressed patients versus control persons: a systematic 631 review and meta-analysis. *Psychoneuroendocrinology* **35**, 1275– 632 1286 (2010).
- 633 [14] Stetler, C. & Miller, G. E. Depression and hypothalamic-pituitary- 634 adrenal activation: a quantitative summary of four decades of re- 635 search. *Psychosomatic Medicine* **73**, 114–126 (2011).
- 636 [15] Murri, M. B. *et al.* Hpa axis and aging in depression: systematic 637 review and meta-analysis. *Psychoneuroendocrinology* **41**, 46–62 638 (2014).
- 639 [16] Boggero, I. A., Hostinar, C. E., Haak, E. A., Murphy, M. L. & 640 Segerstrom, S. C. Psychosocial functioning and the cortisol awak- 641 ening response: Meta-analysis, p-curve analysis, and evaluation of 642 the evidential value in existing studies. *Biological Psychology* **129**, 643 207–230 (2017).
- 644 [17] Hogenelst, K., Soeter, M. & Kallen, V. Ambulatory measurement of 645 cortisol: Where do we stand, and which way to follow? *Sensing 646 and Bio-Sensing Research* **22**, 100249 (2019).
- 647 [18] Valenza, G. *et al.* Wearable monitoring for mood recognition in 648 bipolar disorder based on history-dependent long-term heart rate 649 variability analysis. *IEEE Journal of Biomedical and Health Infor- 650 matics* **18**, 1625–1635 (2013).
- 651 [19] Mohan, P. M., Nagarajan, V. & Das, S. R. Stress measurement from 652 wearable photoplethysmographic sensor using heart rate variabil- 653 ity data. In *2016 International Conference on Communication and 654 Signal Processing (ICCCSP)*, 1141–1144 (IEEE, 2016).
- 655 [20] Poh, M.-Z., Swenson, N. C. & Picard, R. W. A wearable sensor for 656 unobtrusive, long-term assessment of electrodermal activity. *IEEE 657 Transactions on Biomedical Engineering* **57**, 1243–1252 (2010).
- 658 [21] Yoon, S., Sim, J. K. & Cho, Y.-H. A flexible and wearable human 659 stress monitoring patch. *Scientific Reports* **6**, 23468 (2016).
- 660 [22] Parlak, O., Keene, S. T., Marais, A., Curto, V. F. & Salleo, A. Molec- 661 ularly selective nanoporous membrane-based wearable organic elec- 662 trochemical device for noninvasive cortisol sensing. *Science Ad- 663 vances* **4**, eaar2904 (2018).
- 664 [23] Torrente-Rodríguez, R. M. *et al.* Investigation of cortisol dynamics 665 in human sweat using a graphene-based wireless mhealth system. 666 *Matter* (2020).
- 667 [24] Niu, S. *et al.* A wireless body area sensor network based on 668 stretchable passive tags. *Nature Electronics* **2**, 361–368 (2019).
- 669 [25] Khan, Y., Ostfeld, A. E., Lochner, C. M., Pierre, A. & Arias, A. C. 670 Monitoring of vital signs with flexible and wearable medical devices. 671 *Advanced Materials* **28**, 4373–4395 (2016).
- 672 [26] Chung, H. U. *et al.* Skin-interfaced biosensors for advanced wireless 673 physiological monitoring in neonatal and pediatric intensive-care 674 units. *Nature Medicine* **26**, 418–429 (2020).
- 675 [27] Dunne, L., Profita, H. & Zeagler, C. Social aspects of wearability 676 and interaction. In *Wearable Sensors*, 25–43 (Elsevier, 2014).
- 677 [28] Beauchaine, T. P. & Thayer, J. F. Heart rate variability as a trans- 678 diagnostic biomarker of psychopathology. *International Journal of 679 Psychophysiology* **98**, 338–350 (2015).
- 680 [29] Steckl, A. J. & Ray, P. Stress biomarkers in biological fluids and 681 their point-of-use detection. *ACS Sensors* **3**, 2025–2044 (2018).
- 682 [30] Khan, Y. *et al.* A flexible organic reflectance oximeter array. *Pro- 683 ceedings of the National Academy of Sciences* **115**, E11015– 684 E11024 (2018).
- 685 [31] Khan, Y. *et al.* Organic multi-channel optoelectronic sensors 686 for wearable health monitoring. *IEEE Access* **7**, 128114–128124 687 (2019).
- 688 [32] Bariya, M. *et al.* Glove-based sensors for multimodal monitoring of 689 natural sweat. *Science Advances* **6**, eabb8308 (2020).
- 690 [33] Taylor, N. A. & Machado-Moreira, C. A. Regional variations in 691 transepidermal water loss, eccrine sweat gland density, sweat se- 692 cretion rates and electrolyte composition in resting and exercising 693 humans. *Extreme Physiology & Medicine* **2**, 4 (2013).
- 694 [34] Zeagler, C. Where to wear it: functional, technical, and social 695 considerations in on-body location for wearable technology 20 years 696 of designing for wearability. In *Proceedings of the 2017 ACM 697 International Symposium on Wearable Computers*, 150–157 (2017).
- 698 [35] Rüsçh, N., Angermeyer, M. C. & Corrigan, P. W. Mental illness 699 stigma: Concepts, consequences, and initiatives to reduce stigma. 700 *European Psychiatry* **20**, 529–539 (2005).
- 701 [36] Hinshaw, S. P. & Cicchetti, D. Stigma and mental disorder: Con- 702 ceptions of illness, public attitudes, personal disclosure, and social 703 policy. *Development and Psychopathology* **12**, 555–598 (2000).
- 704 [37] Profita, H. P. *et al.* Don't mind me touching my wrist: a case study 705 of interacting with on-body technology in public. In *Proceedings of 706 the 2013 International Symposium on Wearable Computers*, 89–96 707 (2013).
- 708 [38] Kelly, N. & Gilbert, S. The wear scale: Developing a measure 709 of the social acceptability of a wearable device. In *Proceedings of 710 the 2016 CHI Conference Extended Abstracts on Human Factors in 711 Computing Systems*, 2864–2871 (2016).
- 712 [39] Kelly, N. The wear scale: Development of a measure of the social 713 acceptability of a wearable device. *Graduate Theses and Disserta- 714 tions, Iowa State University* (2016).
- 715 [40] Ingram IV, P. B., Clarke, E. & Lichtenberg, J. W. Confirmatory factor 716 analysis of the perceived stress scale-4 in a community sample. 717 *Stress and Health* **32**, 173–176 (2016).
- 718 [41] Warttig, S. L., Forshaw, M. J., South, J. & White, A. K. New, 719 normative, english-sample data for the short form perceived stress 720 scale (pss-4). *Journal of Health Psychology* **18**, 1617–1628 (2013).

## Acknowledgements

This work was supported in part by the Stanford Catalyst for Collaborative Solutions and the National Science Foundation SenSE program (grant no. 2037304). We thank Min-gu Kim, Chenxin Zhu, Hongping Yan, Sahar Harati, and Eusha Abdullah Mashfi for technical discussions and helping with the manuscript. Contributions from M.L.M. were made while in transition from Stanford University to the University of Delaware.

730 **Author contributions**

731 Y.K., M.L.M., Z.B., and P.E.P. designed the research. Y.K.,  
732 N.V., J.Li, J.K., A.F., D.D., and E.S. contributed to the  
733 biosignals portion of the study. M.L.M., P.N., A.M., and  
734 G.H. contributed to the human factors portion of the study.  
735 J.Landay, J.Liphardt, L.W., K.S., B.M., Z.B., and P.E.P. over-  
736 saw the project. Y.K., M.L.M, P.N, Z.B., and P.E.P. wrote  
737 the manuscript, and all authors edited the manuscript.

738 **Additional information**

739 **Supplementary Information** accompanies this paper at [Link]

740 **Competing financial interests:** A provisional patent ap-  
741 plication has been filed based on the technology described  
742 in this work.

743 **Reprints and permission** information is available online  
744 at

745 **How to cite this article:**

## Supplementary information

# Design considerations of a wearable electronic-skin for mental health and wellness: balancing biosignals and human factors

## Contents

|   |                                                                                     |    |
|---|-------------------------------------------------------------------------------------|----|
| 1 | Supplementary Note 1: Human factors study                                           | 1  |
| 2 | Supplementary Note 2: Impact of respiration on biosignals on the chest and stomach. | 13 |
| 3 | Supplementary Note 3: Individual impacts of SC and HRV on optimal wear location     | 15 |

## List of Figures

|    |                                                                                                     |    |
|----|-----------------------------------------------------------------------------------------------------|----|
| 1  | Supplementary Fig. 1: Design probe study overview . . . . .                                         | 2  |
| 2  | Supplementary Fig. 2: Perceived stress levels (from design probe study survey) . . . . .            | 3  |
| 3  | Supplementary Fig. 3: Survey body maps . . . . .                                                    | 4  |
| 4  | Supplementary Fig. 4: Examples of wear locations . . . . .                                          | 5  |
| 5  | Supplementary Fig. 5: Wear locations compiled . . . . .                                             | 6  |
| 6  | Supplementary Fig. 6: Partial WEAR Scale derived questionnaire (from design probe survey) . . . . . | 7  |
| 7  | Supplementary Fig. 7: Hygiene (from design probe study survey) . . . . .                            | 8  |
| 8  | Supplementary Fig. 8: The complete NIR PPG dataset of $n=10$ participants used in the HRV analysis  | 9  |
| 9  | Supplementary Fig. 9: The reproducibility of HRV measurement . . . . .                              | 10 |
| 10 | Supplementary Fig. 10: The complete SC dataset of $n=10$ participants . . . . .                     | 11 |
| 11 | Supplementary Fig. 11: The reproducibility of SC measurement . . . . .                              | 12 |
| 12 | Supplementary Fig. 12: Impact of respiration on biosignals on the chest and stomach . . . . .       | 13 |
| 13 | Supplementary Fig. 13: Sweat cortisol distribution on the body . . . . .                            | 14 |
| 14 | Supplementary Fig. 14: Individual impacts of SC and HRV on optimal wear location . . . . .          | 16 |

## 1 Supplementary Note 1: Human factors study

We conducted a two-part design probe study to investigate users' perceptions of wearable devices and emerging electronic-skin (e-skin) technologies for stress monitoring and other mental health and wellness applications (Supplementary Figs. 1-7). In part one, public kiosks were set up at three different locations: a campus café, the campus bookstore, and the local public library. From these kiosks, we recruited passersby for brief semi-structured interviews (*Median*=24 min, *standard deviation*=4.5 min). In addition to questions about their wearable device use, participants were asked to indicate on paper body diagrams (Supplementary Fig. 3) where they would and would not wear an e-skin for mental health and wellness applications while "thinking aloud" to explain their rationale. They then applied a low-fidelity version of our sensor to their preferred body location using medical grade tape and completed a short survey about their demographics, the comfort of the wearable prototype, and the perceived social acceptability around its use (derived from the WEAR Scale<sup>[1,2]</sup>). In part two, we asked participants to go about the rest of their day while continuing to wear the low-fidelity prototype and then to complete a follow-up survey similar to the prior but with additional open-text response questions about their experience.

We recruited  $n=24$  participants (12 male, 11 female, 1 non-binary) from the Palo Alto, California area. Participants were, on average, 35.8 years old (*Median*=28, *standard deviation*=15.4). Most (79%) had a high degree of formal education (bachelor's and higher) and most (79%) were white or asian. Half (50%) were working full-time and over a third (38%) were students. Scores on the short Perceived Stress Scale (PSS-4)<sup>[3,4]</sup> indicate that most experienced moderate levels of stress over the last month (*Median*=6.44, *standard deviation*=3.29) (Supplementary Fig. 2). When asked about their prior experience with wearable technology, we found that a majority of participants (87%) strongly associated

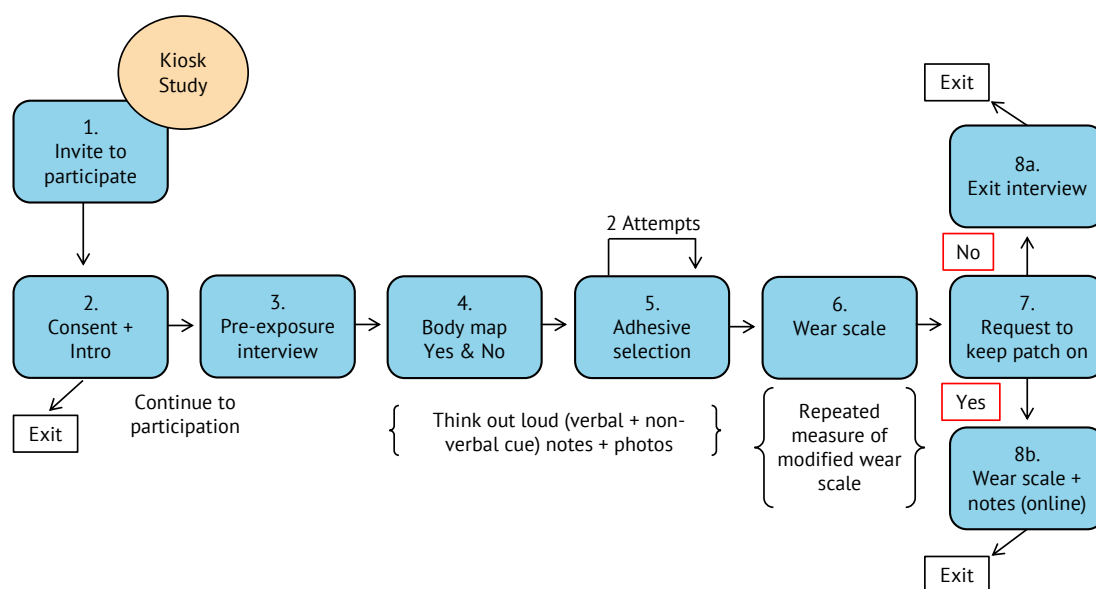

**Supplementary Fig. 1. Design probe study overview.** (1) Potential participants are recruited from passersby. (2) Researcher and potential participants review the consent form with the reviewer answering any questions about the process. (3) The researcher conducts a brief semi-structured interview asking about the participants prior experience with wearable devices and their thoughts on using wearables for mental health and wellness applications (e.g., monitoring daily stress). (4) Participants are then introduced to the concept of an electronic-skin (e-skin) wearable device and asked where they might be comfortable wearing such a device given the mental health and wellness context. (5) Participants are then asked to apply a low-fidelity mockup of our e-skin wearable device to their skin. (6) After adhering the mockup device, participants are asked to complete a survey that asks them about their demographics as well as questions derived from the WEAR Scale<sup>[1,2]</sup> focusing on social perceptions of e-skin wearable devices, comfort of the wearable prototype, and other factors. (7) Participants are then asked if they would mind continuing to wear the mockup device for the rest of their day. The session ends with participants either removing the mockup device (8a) or continuing to wear the device and completing another survey later that evening (8b); the follow-up survey was similar to the first with demographic questions removed and open-form experiential questions added.

wearables with wrist-worn technology for fitness tracking and, in particular, smartwatches. By aggregating participant's paper body maps (Supplementary Fig 3), we are able to generate location preferences for e-skin wearables for mental health and wellness.

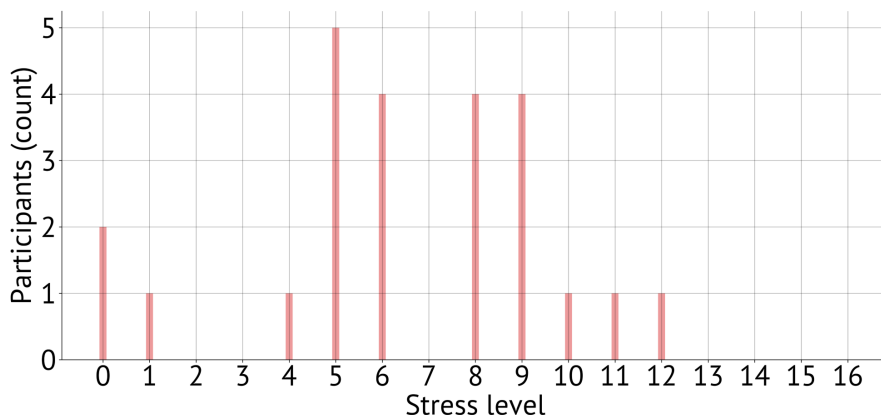

**Supplementary Fig. 2. Perceived stress levels (from design probe survey):** As part of the demographic questions asked on the survey during the in-person design probe sessions, participants completed the short Perceived Stress Scale (PSS-4)<sup>[3,4]</sup> to assess the level of stress they experienced in the past month. Results indicate that most participants experienced a moderate level of stress (*Median*=6.44, *standard deviation*=3.29).



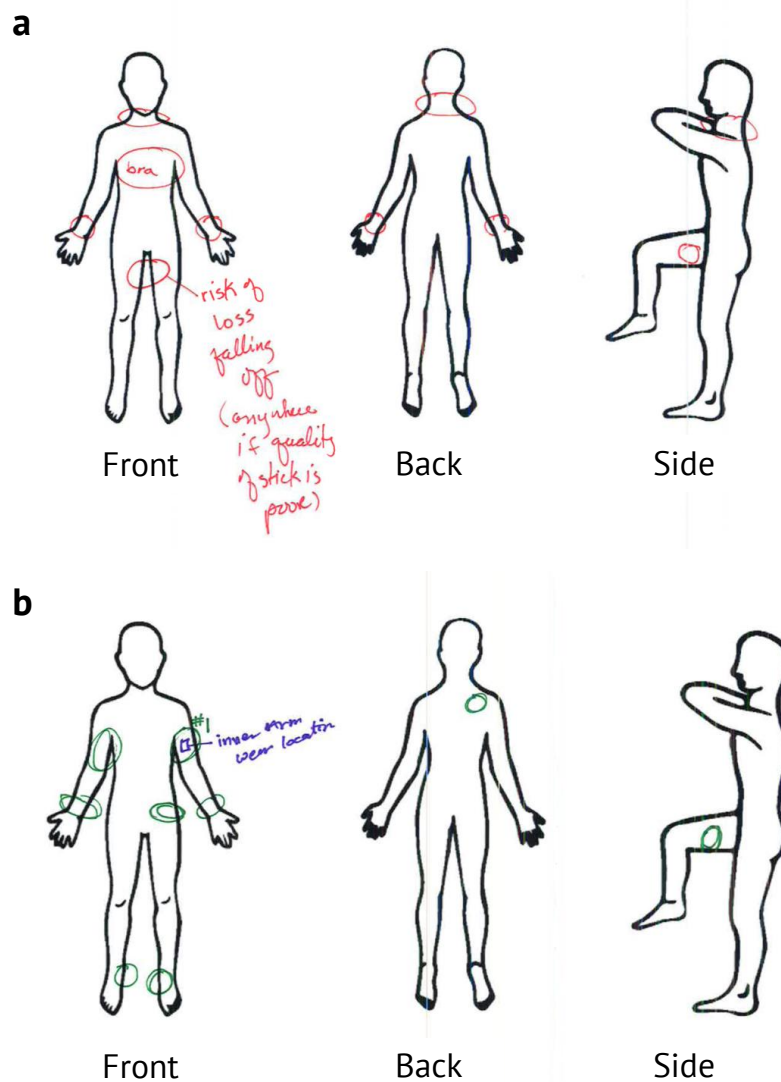

**Supplementary Fig. 3. Survey body maps:** To inform the future design of e-skin wearables for mental health and wellness applications, participants completed paper body maps to indicate where they would and would not be comfortable wearing an e-skin wearable. Participants were instructed to “think aloud” and annotate their body maps while the researcher collected notes. (a) The participant has indicated that the inside of the legs would be problematic (red) for them—worrying that the wearable may fall off as a result of natural body movement. (b) The participant also indicated that the upper arm was their preferred location (green) with a “#1” and that this was where they wore the low-fidelity mockup of the device (blue) during and after departing the design probe session.

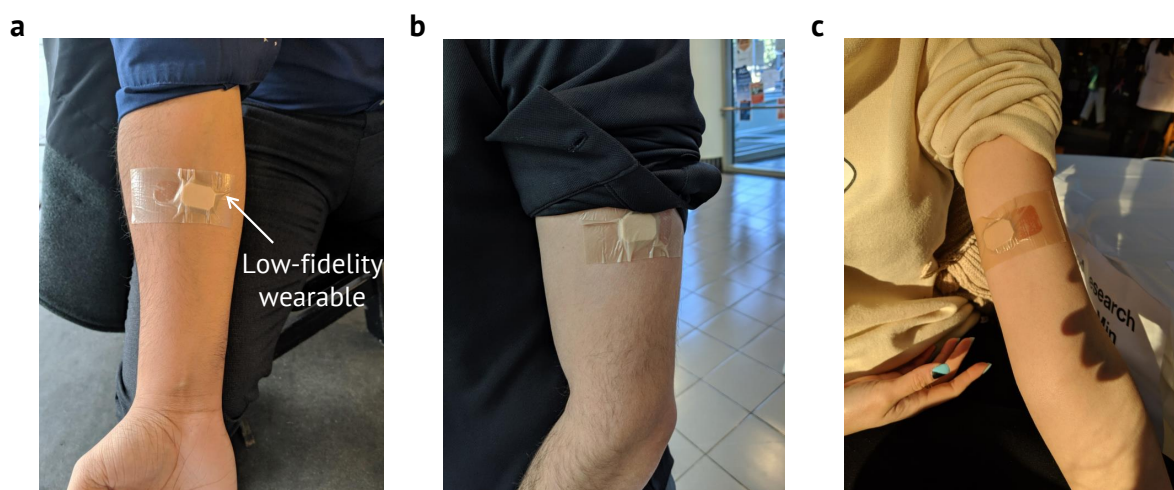

**Supplementary Fig. 4. Examples of wear locations:** With participant permission, the researcher at the design probe collected photos of wear locations that were often (a) the underside of the forearm, (b) the outside of the upper arm, and (c) the inside of the upper arm.

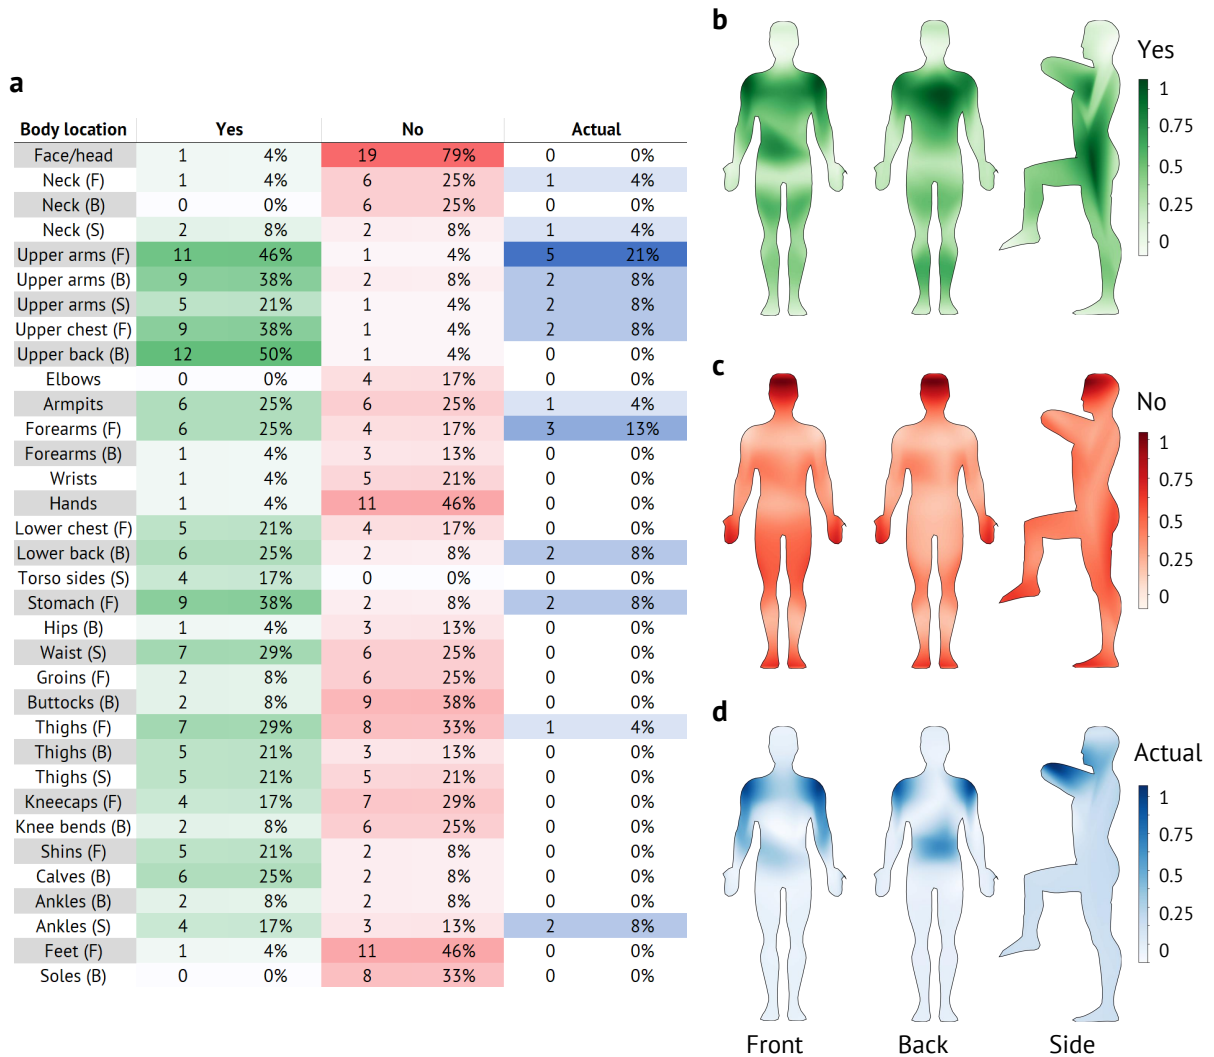

**Supplementary Fig. 5.** Wear locations compiled: (a) Body maps were divided into 34 regions and counts were aggregated based on where participants would and would not wear an e-skin device for mental health and wellness applications as well as where they actually wore the low-fidelity device during and after the design probe session. (b-d) This data was converted into body contour maps, which demonstrate preferences that can inform future designers of such technology.

| Survey Item                                                                                                  | Category          | Before         | After          | Cohen's d | P-value | Perception Change |
|--------------------------------------------------------------------------------------------------------------|-------------------|----------------|----------------|-----------|---------|-------------------|
| This skin wearables could make people uncomfortable.                                                         | Consequences      | 2.50 (SD=1.12) | 1.82 (SD=0.83) | -0.49     | 0.006   | Positive          |
| I like what this device communicates about its wearer.                                                       | Self-identity     | 3.05 (SD=0.98) | 2.36 (SD=1.02) | -0.48     | 0.025   | Negative          |
| This device's placement on the body could cause awkwardness or embarrassment.                                | Consequences      | 2.50 (SD=1.16) | 1.86 (SD=1.10) | -0.40     | 0.045   | Positive          |
| I can imagine that people would be interested in this skin wearable and would not have a problem wearing it. | Norms             | 3.45 (SD=0.72) | 3.77 (SD=0.60) | +0.34     | 0.050   | Positive          |
| There is no chance of being ridiculed when wearing this skin wearable.                                       | Other's reactions | 2.23 (SD=1.20) | 2.82 (SD=1.37) | +0.32     | 0.029   | Positive          |
| This skin wearable seems to be useful and easy to use.                                                       | Judgement         | 3.86 (SD=0.55) | 3.64 (SD=0.71) | -0.25     | 0.135   | Not significant   |
| This skin wearable might restrict movement or physically get in the way.                                     | Ergonomics        | 1.55 (SD=0.99) | 1.27 (SD=1.09) | -0.18     | 0.266   | Not significant   |
| Use of this skin wearable raises privacy issues.                                                             | Consequences      | 2.73 (SD=1.05) | 2.45 (SD=1.23) | -0.17     | 0.110   | Not significant   |
| The majority of people probably think this skin wearable is OK to wear in public.                            | Other's thoughts  | 3.36 (SD=0.88) | 3.14 (SD=1.10) | -0.16     | 0.261   | Not significant   |
| This device seems comfortable, not itchy or irritating.                                                      | Ergonomics        | 3.77 (SD=1.13) | 4.00 (SD=0.95) | +0.15     | 0.459   | Not significant   |
| This skin wearable could help people.                                                                        | Consequences      | 3.95 (SD=0.64) | 4.09 (SD=0.67) | +0.15     | 0.186   | Not significant   |
| Use of this monitoring skin wearable could cause additional stress.                                          | Consequences      | 2.23 (SD=1.04) | 2.05 (SD=1.11) | -0.12     | 0.463   | Not significant   |
| This device looks natural and not out of place on the body.                                                  | Ergonomics        | 2.95 (SD=1.36) | 3.14 (SD=0.87) | +0.11     | 0.492   | Not significant   |
| The size of this device is conveniently small.                                                               | Ergonomics        | 3.68 (SD=0.97) | 3.82 (SD=0.83) | +0.11     | 0.504   | Not significant   |
| I think my peers would find skin wearables acceptable to wear on the skin.                                   | Other's thoughts  | 3.77 (SD=0.79) | 3.68 (SD=0.87) | -0.08     | 0.427   | Not significant   |
| This skin wearable could be considered a normal part of everyday life.                                       | Norms             | 3.55 (SD=0.84) | 3.45 (SD=0.84) | -0.08     | 0.680   | Not significant   |
| Use of this skin wearable could hurt the wearer's social reputation.                                         | Consequences      | 1.95 (SD=1.19) | 1.86 (SD=0.92) | -0.06     | 0.492   | Not significant   |
| This monitoring device seems like "too much" technology.                                                     | Judgement         | 1.68 (SD=0.97) | 1.64 (SD=1.23) | -0.03     | 0.789   | Not significant   |
| This device is consistent with my self-image.                                                                | Self-identity     | 2.82 (SD=1.11) | 2.82 (SD=0.94) | 0.00      | 1.000   | Not significant   |
| The way this device displays membership to a certain social group is appealing.                              | Self-identity     | 1.86 (SD=1.01) | 1.86 (SD=0.92) | 0.00      | 1.000   | Not significant   |

**Supplementary Fig. 6. Partial WEAR Scale derived questionnaire (from design probe study survey):** Participants who completed both parts of our design probe study rated several items derived from the WEAR Scale<sup>[1,2]</sup> that corresponded to social perceptions, ergonomics, and self-image. On a five point likert, higher scores tends to reveal positive attitudes while lower scores tend to indicate negative attitudes. While overall impressions of e-skin wearables were positive and consistent pre- and post-wear, we detected a significant change in 5 specific questions. We calculated the change significance using the parametric t-test after the Shapiro-Wilk test confirmed the normality of the distribution of the responses to each survey item. Additionally, Cohen's d was calculated as a relative measure of the change size. The comparison of the pre- and post-wear survey results indicate that after a short wear of a low-fidelity device, participants showed less concern that the wearable might make others uncomfortable, cause awkwardness, or result in being ridiculed. Paradoxically, while participants believed there were less negative consequences with wearing the device, they became increasingly more worried about what such a device might communicate about them.

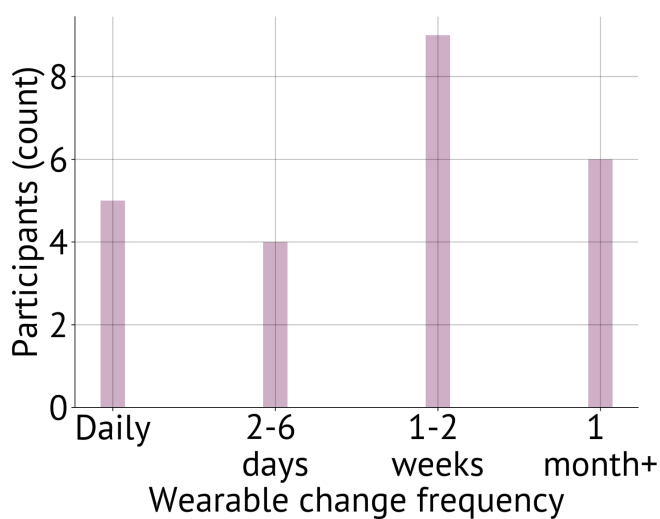

**Supplementary Fig. 7. Hygiene (from design probe survey):** Participants were asked how frequently they would want to change an e-skin wearable. Most would prefer to change the wearable between 1 - 2 weeks—similar to charging a smartwatch. Others would prefer to change the e-skin wearable device daily or even every few days while others would prefer to change the device every month or more (i.e., for consistent longitudinal data).

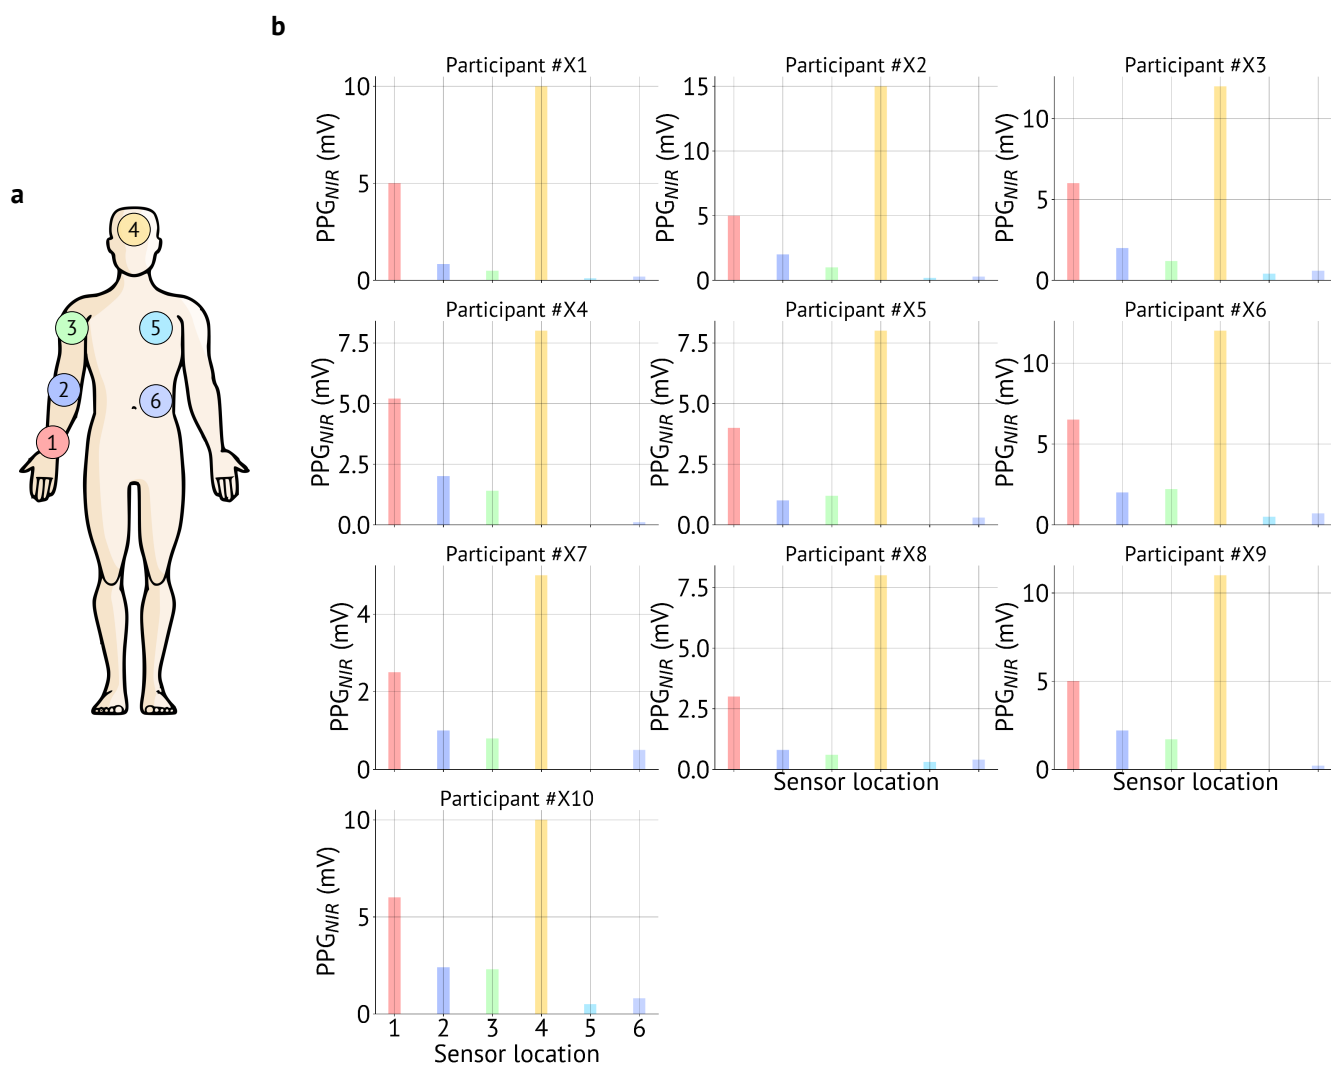

**Supplementary Fig. 8. The complete NIR PPG dataset of  $n=10$  participants used in the HRV analysis. (a) Sensor placement locations – (1) wrist, (2) forearm, (3) upper arm, (4) forehead, (5) upper chest, and (6) stomach. (b) PPG signal magnitudes for NIR light on the aforementioned 6 locations for  $n=10$  participants. HRV is derived from PPG, hence, PPG signal magnitudes are used in the analysis.**

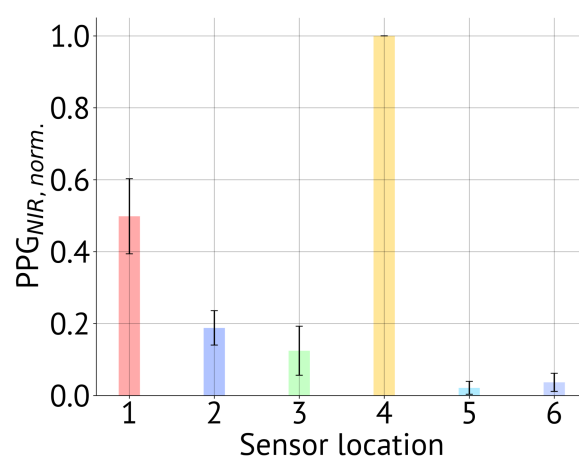

**Supplementary Fig. 9. The reproducibility of HRV measurement.** Since HRV is derived from PPG, PPG signal magnitudes are used in the analysis. Five consecutive NIR PPG measurements were collected from one participant while donning and doffing the sensor for each measurement on (1) wrist, (2) forearm, (3) upper arm, (4) forehead, (5) upper chest, and (6) stomach. NIR PPG signal was normalized for each set of measurements on the aforementioned six locations. The bar heights represent the average of the normalized value and the error bars represent the standard deviation of the normalized value.

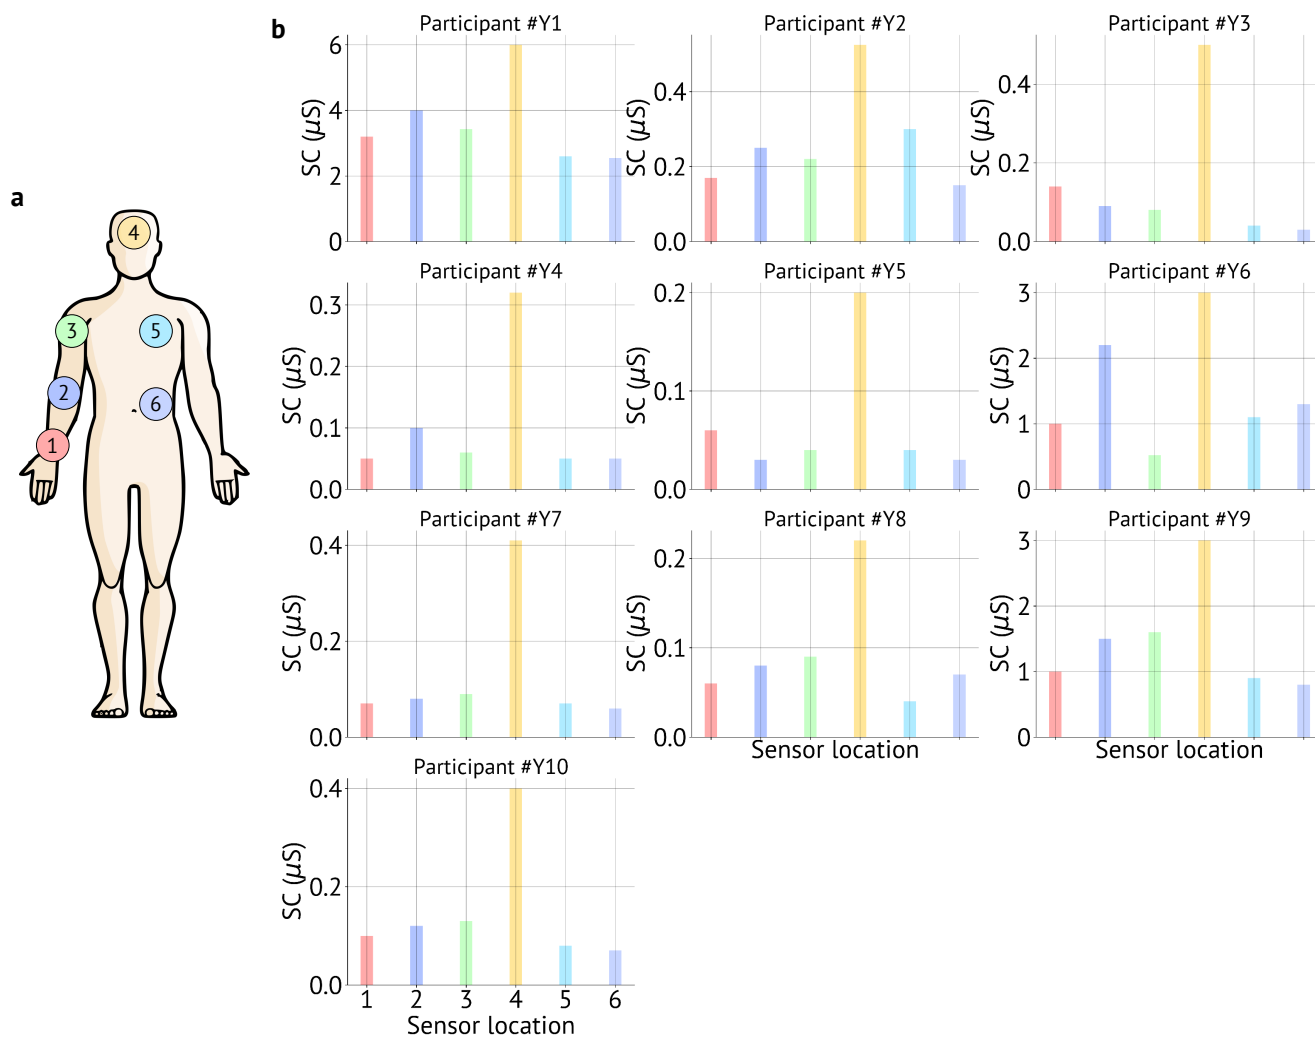

**Supplementary Fig. 10. The complete SC dataset of  $n=10$  participants. (a)** Sensor placement locations – (1) wrist, (2) forearm, (3) upper arm, (4) forehead, (5) upper chest, and (6) stomach. **(b)** SC signal magnitudes on the aforementioned 6 locations for  $n=10$  participants.



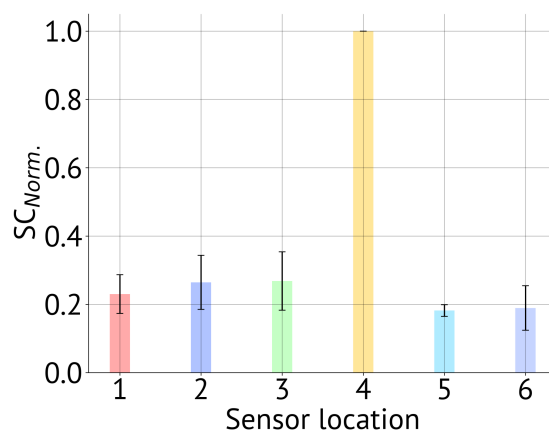

**Supplementary Fig. 11. The reproducibility of SC measurement.** Five consecutive SC measurements were collected from one participant while donning and doffing the sensor for each measurement on (1) wrist, (2) forearm, (3) upper arm, (4) forehead, (5) upper chest, and (6) stomach. SC signal was normalized for each set of measurements on the aforementioned six locations. The bar heights represent the average of the normalized value and the error bars represent the standard deviation of the normalized value.

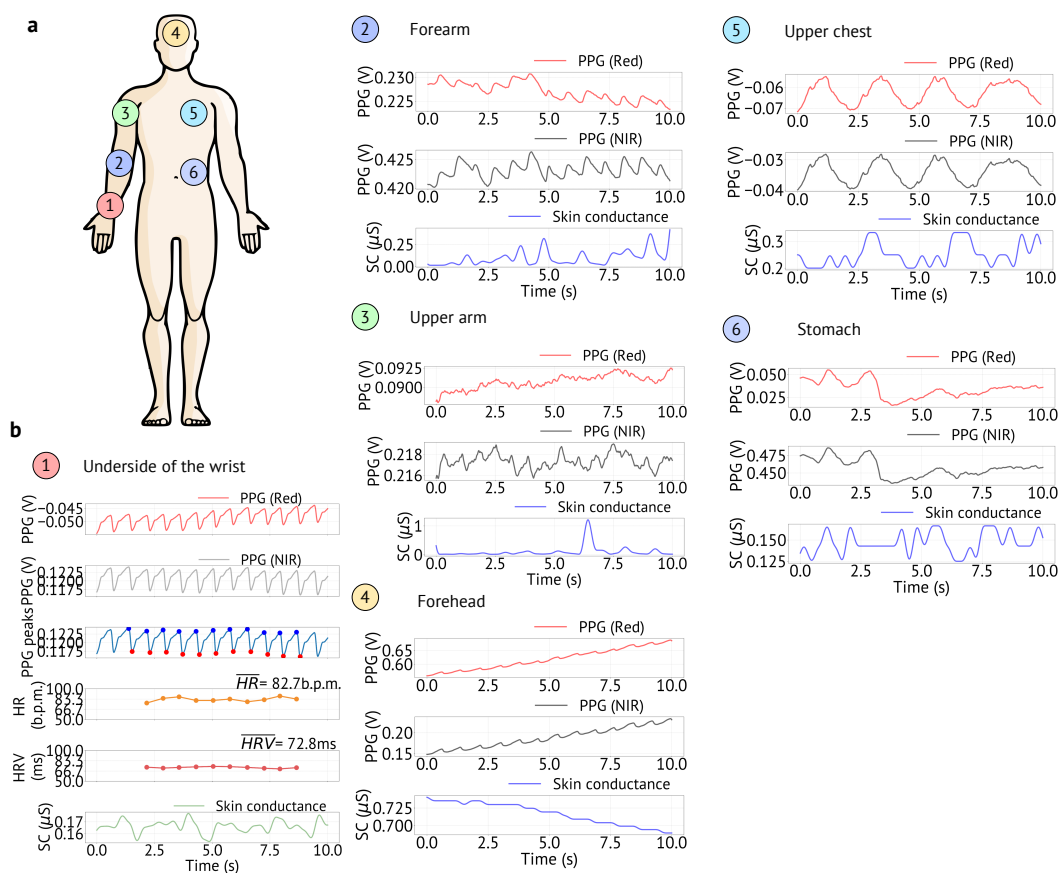

**Supplementary Fig. 12. Impact of respiration on biosignals on the chest and stomach.** (a) Heart rate variability (HRV) and skin conductance (SC) data collection locations – (1) wrist, (2) forearm, (3) upper arm, (4) forehead, (5) upper chest, and (6) stomach. (b) PPG from red and NIR channels, systolic and diastolic peaks from PPG, heart rate (HR), HRV calculated from PPG signal, and SC from the 6 highlighted locations shown in a. The PPG signal is clear on the wrist, forearm, upper arm, and forehead. The PPG signal gets highly attenuated on the upper chest and stomach. The modulation is obvious on the chest, and the respiration signal is clearly visible in b(5). Therefore, it is hard to get the PPG signal, hence, HRV cannot be calculated from the chest or the stomach.

## 2 Supplementary Note 2: Impact of respiration on biosignals on the chest and stomach.

During the on-body biosignal data collection, we observed on the chest and the stomach, the PPG signal gets modulated with respiration. Since the PPG signal is a small pulsating signal on top of a big static signal, any motion gets coupled to both signals. A representative data where respiration severely affects the PPG signal is shown in Supplementary Fig. 12b(5)-(6). The modulation is obvious on the chest, and the respiration signal is clearly visible. In such a scenario, it is hard to get the PPG signal, hence, HRV cannot be calculated from the chest or the stomach.

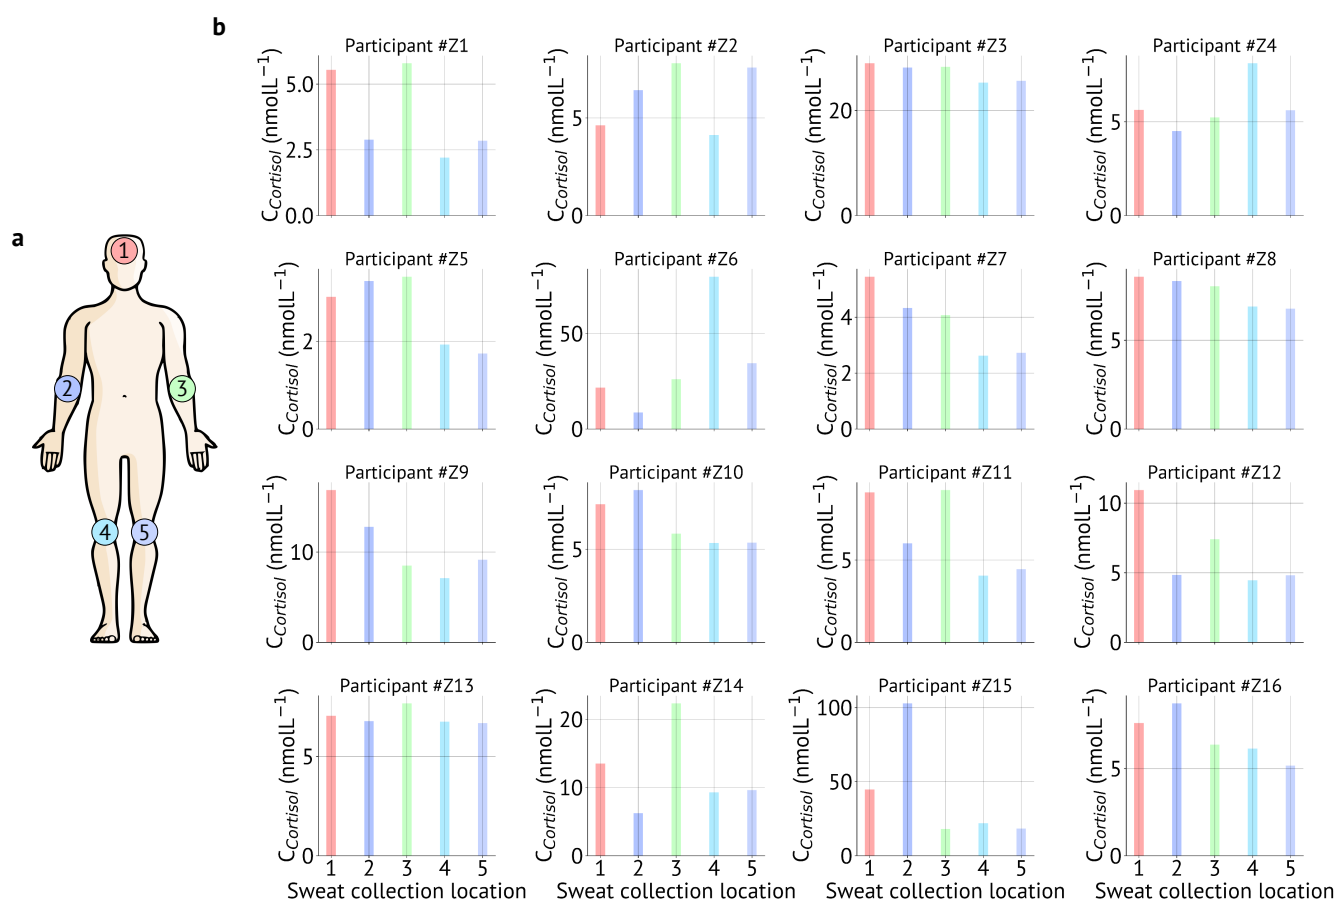

**Supplementary Fig. 13. Sweat cortisol distribution on the body.** (a) Sweat collection locations - (1) forehead, (2) right arm (cubital fossa), (3) left arm (cubital fossa), (4) back of the right knee (popliteal fossa), and (5) back of the left knee (popliteal fossa). (b) Sweat cortisol concentrations on the aforementioned 5 locations. The bar chart shows data collected from  $n=16$  participants.

### 3 Supplementary Note 3: Individual impacts of SC and HRV on optimal wear location

In our analysis, the user preference data was collected from the design probe study, and the biosignals data was collected from the on-body sensing. Then, we combined SC, HRV, and cortisol body maps to create the biosignal body contour map using equal weights,  $S_{Biosignals} = w_1 \times S_{SC} + w_2 \times S_{HRV} + w_3 \times S_{Cortisol}$ , where,  $w_1 = w_2 = w_3 = 0.33$ . However, in this section, we investigate the effects of SC on  $I_{Wear}$  using the equation:  $I_{Wear} = w_1 \times S_{Preference} + w_2 \times S_{SC}$  (Supplementary Figs. 14a-c). Similarly, we investigate the effects of HRV on  $I_{Wear}$  using the equation:  $I_{Wear} = w_1 \times S_{Preference} + w_2 \times S_{HRV}$  (Supplementary Figs. 14d-f). In both cases,  $w_1$  and  $w_2$  were assigned the combinations of  $(w_1 = 0.75, w_2 = 0.25)$ ,  $(w_1 = 0.50, w_2 = 0.50)$ , and  $(w_1 = 0.25, w_2 = 0.75)$ . It is important to mention that our HRV signal is derived from PPG signal. Therefore, we used PPG signal magnitude as a proxy for HRV signal.

For SC, with  $(w_1 = 0.75, w_2 = 0.25)$  and  $(w_1 = 0.50, w_2 = 0.50)$ ,  $I_{Wear}$  remains high on places that are normally covered with everyday clothing. For  $(w_1 = 0.25, w_2 = 0.75)$ ,  $I_{Wear}$  is high on the extremities of the body. For HRV, with  $(w_1 = 0.75, w_2 = 0.25)$   $I_{Wear}$  remain high on places that are normally covered with everyday clothing. When,  $(w_1 = 0.50, w_2 = 0.50)$ ,  $I_{Wear}$  is high on the upper arm and the forearm areas. With  $(w_1 = 0.25, w_2 = 0.75)$ , the body contour map almost resembles the Biosignals body map, and  $I_{Wear}$  is high on the extremities of the body. Note that, due to the high variability of the HRV signal on the body, the effects of the HRV signal is more pronounced on the optimal placement location.

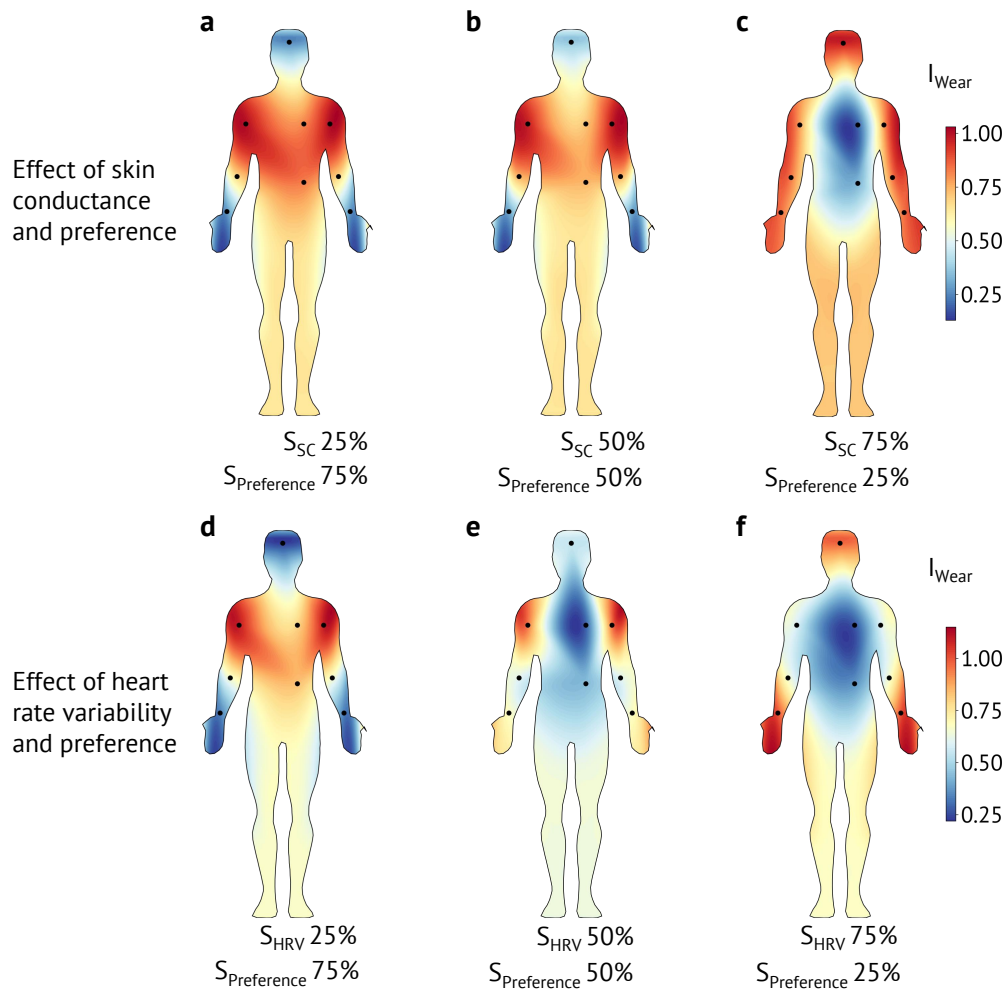

**Supplementary Fig. 14. Individual impacts of SC and HRV on optimal wear location.** (a-c) The impact of SC on  $I_{Wear}$  is investigated using the equation:  $I_{Wear} = w_1 \times S_{Preference} + w_2 \times S_{SC}$ . Here,  $w_1$  and  $w_2$  were assigned the combinations of ( $w_1 = 0.75, w_2 = 0.25$ ) in a, ( $w_1 = 0.50, w_2 = 0.50$ ) in b, and ( $w_1 = 0.25, w_2 = 0.75$ ) in c. (d-f) The impact of HRV on  $I_{Wear}$  is investigated using the equation:  $I_{Wear} = w_1 \times S_{Preference} + w_2 \times S_{HRV}$ . Here,  $w_1$  and  $w_2$  were assigned the combinations of ( $w_1 = 0.75, w_2 = 0.25$ ) in d, ( $w_1 = 0.50, w_2 = 0.50$ ) in e, and ( $w_1 = 0.25, w_2 = 0.75$ ) in f. Due to the high variability of the HRV signal on the body, the effects of the HRV signal is more pronounced on the optimal placement location.

## References

- [1] Kelly, N. & Gilbert, S. The wear scale: Developing a measure of the social acceptability of a wearable device. In *Proceedings of the 2016 CHI Conference Extended Abstracts on Human Factors in Computing Systems*, 2864–2871 (2016).
- [2] Kelly, N. The wear scale: Development of a measure of the social acceptability of a wearable device. *Graduate Theses and Dissertations, Iowa State University* (2016).
- [3] Ingram IV, P. B., Clarke, E. & Lichtenberg, J. W. Confirmatory factor analysis of the perceived stress scale-4 in a community sample. *Stress and Health* **32**, 173–176 (2016).
- [4] Warrtig, S. L., Forshaw, M. J., South, J. & White, A. K. New, normative, english-sample data for the short form perceived stress scale (pss-4). *Journal of Health Psychology* **18**, 1617–1628 (2013).
